1 **Shared and disease-specific host gene-microbiome interactions across human**  
2 **diseases**

3

4 Sambhawa Priya<sup>1,3</sup>, Michael B. Burns<sup>4</sup>, Tonya Ward<sup>5</sup>, Ruben A. T. Mars<sup>6</sup>, Beth  
5 Adamowicz<sup>1</sup>, Eric F. Lock<sup>7</sup>, Purna C. Kashyap<sup>6</sup>, Dan Knights<sup>5,8</sup>, Ran Blekhman<sup>1,2,\*</sup>

6

7 \*Corresponding author: [blekhman@umn.edu](mailto:blekhman@umn.edu)

8

9 <sup>1</sup> Department of Genetics, Cell Biology and Development, University of Minnesota,  
10 Minneapolis, MN 55455, USA

11 <sup>2</sup> Department of Ecology, Evolution, and Behavior, University of Minnesota,  
12 Minneapolis, MN 55455, USA

13 <sup>3</sup> Bioinformatics and Computational Biology, University of Minnesota, Minneapolis, MN  
14 55455, USA

15 <sup>4</sup> Department of Biology, Loyola University Chicago, Chicago, IL 60660, USA

16 <sup>5</sup> BioTechnology Institute, College of Biological Sciences, University of Minnesota,  
17 Minneapolis, MN 55455, USA

18 <sup>6</sup> Division of Gastroenterology and Hepatology, Department of Internal Medicine, Mayo  
19 Clinic, Rochester, MN 55902, USA

20 <sup>7</sup> Division of Biostatistics, School of Public Health, University of Minnesota, Minneapolis,  
21 MN 55455, USA

22 <sup>8</sup> Department of Computer Science and Engineering, University of Minnesota,  
23 Minneapolis, MN 55455, USA

24

25 **Abstract**

26

27 While the gut microbiome and host gene regulation separately contribute to  
28 gastrointestinal disorders, it is unclear how the two may interact to influence host  
29 pathophysiology. Here, we developed a machine learning-based framework to jointly  
30 analyze host transcriptomic and microbiome profiles from 416 colonic mucosal samples  
31 of patients with colorectal cancer, inflammatory bowel disease, and irritable bowel  
32 syndrome. We identified potential interactions between gut microbes and host genes  
33 that are disease-specific, as well as interactions that are shared across the three  
34 diseases, involving host genes and gut microbes previously implicated in  
35 gastrointestinal inflammation, gut barrier protection, energy metabolism, and  
36 tumorigenesis. In addition, we found that mucosal gut microbes that have been  
37 associated with all three diseases, such as *Streptococcus*, interact with different host  
38 pathways in each disease, suggesting that similar microbes can affect host  
39 pathophysiology in a disease-specific manner through regulation of different host genes.

40

41

42

43

## 44 Introduction

45

46 The human gut microbiome plays a critical role in modulating human health and  
47 disease. Variations in the composition of the human gut microbiome have been  
48 associated with a wide variety of chronic diseases, including colorectal cancer (CRC),  
49 inflammatory bowel disease (IBD), and irritable bowel syndrome (IBS). For example,  
50 previous studies have reported an increase in abundance of *Fusobacterium nucleatum*  
51 and *Parvimonas* in CRC <sup>1,2</sup>, reduced abundance of *Faecalibacterium prausnitzii* and  
52 enrichment of enterotoxigenic *Bacteroides fragilis* in CRC and IBD <sup>3-5</sup>, and  
53 overrepresentation of Enterobacteriaceae and *Streptococcus* in IBD and IBS <sup>6-8</sup>. In  
54 addition to the gut microbiome, dysregulation of host gene expression and pathways  
55 have also been implicated in these diseases. Researchers have reported disruption of  
56 Notch and WNT signalling pathways in CRC <sup>9,10</sup>, activation of toll-like receptors (e.g.  
57 TLR4) that induce NF- $\kappa$ B and TNF- $\alpha$  signaling pathways in IBD <sup>11,12</sup>, and dysregulation  
58 of immune response and intestinal antibacterial gene expression in IBS <sup>8,13</sup>. While host  
59 transcription and gut microbiome have separately been identified as contributing factors  
60 to these gastrointestinal (GI) diseases, it is unclear how the two may interact to  
61 influence host pathophysiology <sup>14</sup>.

62

63 Studies in model organisms have demonstrated that the modulation of host gene  
64 expression by the gut microbiome is a potential mechanism by which microbes can  
65 affect host physiology <sup>15-20</sup>. For example, in zebrafish, the gut microbiome negatively  
66 regulates the transcription factor hepatocyte nuclear factor 4, leading to host gene  
67 expression profiles associated with human IBD <sup>18</sup>. In mice, the gut microbiota can alter  
68 host epigenetic programming to modulate intestinal gene expression involved in  
69 immune and metabolic processes <sup>16,17</sup>. Additionally, recent *in vitro* cell culture  
70 experiments have shown that specific gut microbes can modify the gene expression in  
71 interacting human colonic epithelial cells <sup>21,22</sup>. Given the evidence for crosstalk between  
72 the gut microbiome and host gene regulation, characterizing the interplay between the  
73 two factors is critical for unravelling their role in the pathogenesis of human intestinal  
74 diseases.

75

76 A few recent studies have investigated interactions between the host transcriptome  
77 and gut microbiome in specific human gut disorders, including IBD, CRC, and IBS. For  
78 example, studies examining microbiome-host gene relationships in IBD have identified  
79 mucosal microbiome associations with host transcripts enriched for  
80 immunoinflammatory pathways <sup>23-25</sup>. While investigating longitudinal host-microbiome  
81 dynamics in IBD, Lloyd-Price et al. identified interactions between expression of  
82 chemokine genes, including *CXCL6* and *DUOX2*, and abundance of gut microbes,  
83 including *Streptococcus* and Ruminococcaceae <sup>25</sup>. Studies investigating the role of host

84 gene-microbiome interactions in CRC have found correlations between the abundance  
85 of pathogenic mucosal bacteria and expression of host genes implicated in  
86 gastrointestinal inflammation and tumorigenesis<sup>26,27</sup>. In IBS, host genes implicated in  
87 gut barrier function and peptidoglycan binding, such as *KIFC3* and *PGLYRP1*, are  
88 associated with microbial abundance of Peptostreptococcaceae and *Intestinibacter*<sup>8</sup>.  
89 While these studies have revealed important insights about host gene-microbiome  
90 crosstalk in GI diseases, they are limited in several aspects. For example, to boost  
91 statistical power, most studies have examined interactions between a limited subset of  
92 host genes and gut microbes; for instance, by focusing only on differentially expressed  
93 genes<sup>24,25,27</sup>, genes associated with immune functions<sup>13,26</sup>, or select microbes  
94 representing bacterial clusters or co-abundance groups<sup>23,26</sup>, thus characterizing only a  
95 subset of potential interactions. In addition, the identification of host gene-microbe  
96 interactions is based on testing for pairwise correlation between every host gene and  
97 microbe using Spearman or Pearson correlation, thus ignoring the inherent multivariate  
98 properties of these datasets<sup>24,25,27</sup>. This approach may also decrease statistical power  
99 to detect biologically meaningful associations due to the large number of statistical tests  
100 performed. Additionally, most studies focus on examining interactions in a single  
101 disease at a time; hence, common and unique patterns of host-microbiome interactions  
102 across multiple disease states remain poorly characterized.

103

104 Here, we comprehensively characterized interactions between mucosal gene  
105 expression and microbiome composition in patients with colorectal cancer, inflammatory  
106 bowel disease, and irritable bowel syndrome, three GI disorders in which both host  
107 gene regulation and gut microbiome have been implicated as contributing factors  
108<sup>1,6,8,10,13</sup>. We developed and applied a machine learning framework that overcomes  
109 typical challenges in multi-omic integrations, including high-dimensionality, sparsity, and  
110 multicollinearity, to identify biologically meaningful associations between gut microbes  
111 and host genes and pathways in each disease. We leveraged our framework to  
112 characterize disease-specific and shared host gene-microbiome interactions across the  
113 three diseases that may facilitate new insights into the molecular mechanisms  
114 underlying pathophysiology of these gastrointestinal diseases.

115

## 116 **Results**

117

118 **Integrating host gene expression and gut microbiome abundance in colorectal**  
119 **cancer, inflammatory bowel disease and irritable bowel syndrome.**

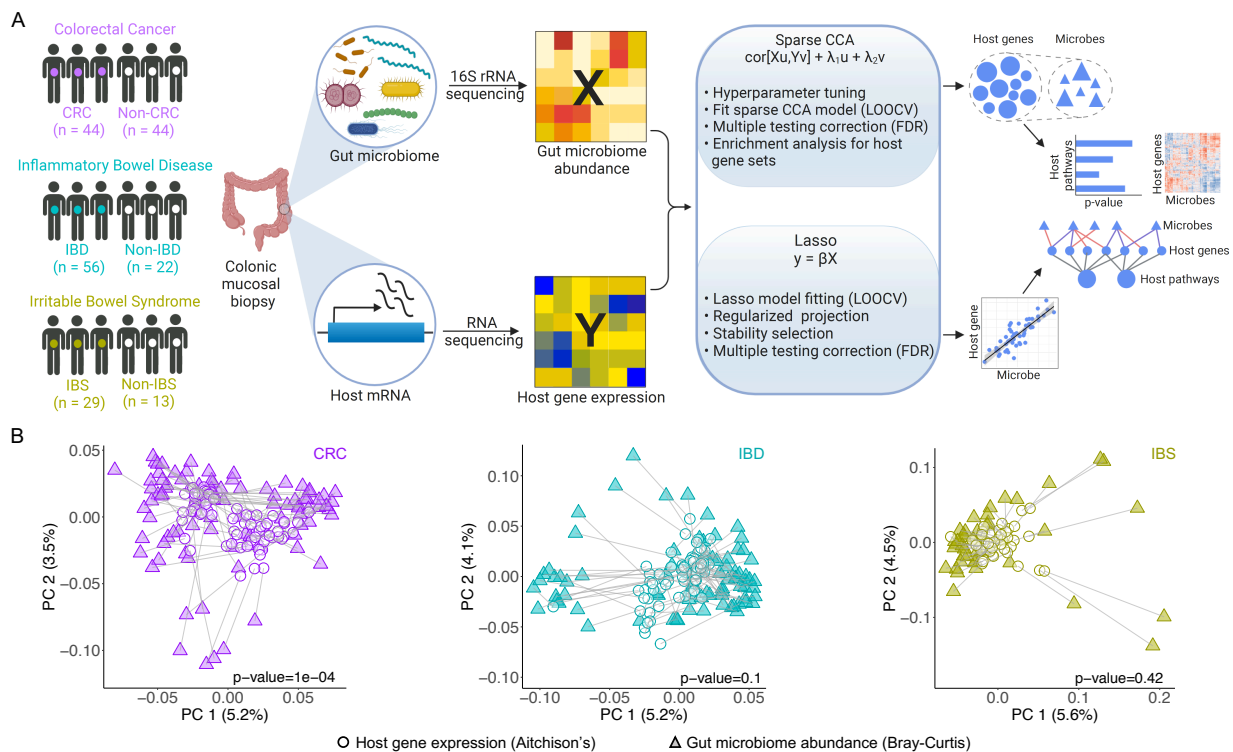

120  
121

122 **Figure 1.** Integrating host gene expression and gut microbiome abundance in colorectal cancer  
123 (CRC), inflammatory bowel disease (IBD), and irritable bowel syndrome (IBS). **A.** Study design  
124 representing disease cohorts, generation of host gene expression data and gut microbiome  
125 abundance data from patient samples, overview of integration framework, and expected output  
126 (left to right). For description of mathematical notations, please see Methods. **B.** Procrustes  
127 analysis showing overall association between variation in host gene expression and gut  
128 microbiome composition in CRC, IBD and IBS (left to right). We used Aitchison's distance for  
129 host gene expression data (circle), and Bray-Curtis distance for gut microbiome data (triangle).

130

131 To study host-microbiome relationship across diseases, we used host gene  
132 expression (RNA-seq) data and gut microbiome abundance (16S rRNA sequencing)  
133 data generated from colonic mucosal biopsies obtained from patients with colorectal  
134 cancer (CRC), inflammatory bowel disease (IBD), and irritable bowel syndrome (IBS)  
135 (**Figure 1A**). Our study included 208 microbiome samples and 208 paired gene  
136 expression samples (416 in total). These 208 paired samples include 88 pairs of  
137 samples in the CRC cohort (44 tumor and 44 patient-matched normal), 78 pairs of  
138 samples in the IBD cohort (56 patients and 22 controls)<sup>25,28</sup>, and 42 pairs of samples in  
139 the IBS cohort (29 patients and 13 controls; see Supplementary Table S1)<sup>8</sup>. Detailed  
140 information on disease cohorts, samples, sequencing, quality control, and data  
141 processing is available in Methods.

142

143 Previous studies have identified host gene-microbiome associations in human gut  
144 disorders, including CRC, IBD, and IBS<sup>8,25,26</sup>. Thus, one might expect intestinal gene  
145 expression patterns and microbiome composition to be broadly correlated in these  
146 diseases. To test for such an overall association between host gene expression and gut  
147 microbiome composition, we performed Procrustes analysis using paired data for each  
148 disease cohort. Our analysis showed significant correspondence between host gene  
149 expression variation and gut microbiome composition across subjects in CRC (Monte  
150 Carlo p-value = 0.0001). However, Procrustes agreement is not significant in IBD  
151 (Monte Carlo p-value = 0.1) and IBS (Monte Carlo p-value = 0.42) (**Figure 1B**, see  
152 Methods). This lack of significant overall correspondence between host transcriptome  
153 and gut microbiome across diseases might suggest that, instead of an overall  
154 association between the two, it is likely that only a subset of gut microbes interact with a  
155 subset of host genes at the colonic epithelium<sup>15,17</sup>. Hence, we need novel integration  
156 approaches to characterize such host gene-microbiome interactions.

157  
158 To this end, we developed a machine learning framework for integrating multi-omic  
159 high-dimensional datasets, such as host gene expression and gut microbiome  
160 abundance, to identify relevant host genes and pathways associated with gut microbes.  
161 Our integration approach has two parts: (i) Sparse canonical correlation analysis  
162 (sparse CCA)<sup>29,30</sup> for identifying groups of host genes that associate with groups of gut  
163 microbial taxa to characterize pathway-level interactions; and (ii) Lasso penalized  
164 regression<sup>31</sup>, for identifying specific interactions between individual host genes and gut  
165 microbial taxa (see **Figure 1**, Methods, Supplementary Figure S1). We applied our  
166 integration analysis to matched host gene expression data and gut microbiome data for  
167 each disease cohort separately to avoid any potential batch effects. For each disease  
168 cohort dataset, we conducted the integration analysis separately for the patient data  
169 (i.e. CRC, IBD, and IBS) and corresponding control data (non-CRC, non-IBD, and non-  
170 IBS, respectively), and considered only associations that were found in patients and not  
171 in controls. As opposed to the Procrustes analysis, our approach identified significant  
172 and potentially biologically meaningful associations between gut microbiota and host  
173 genes and pathways across the three diseases.

174

175 **Shared host pathways associate with disease-specific gut microbes across GI**  
176 **diseases**

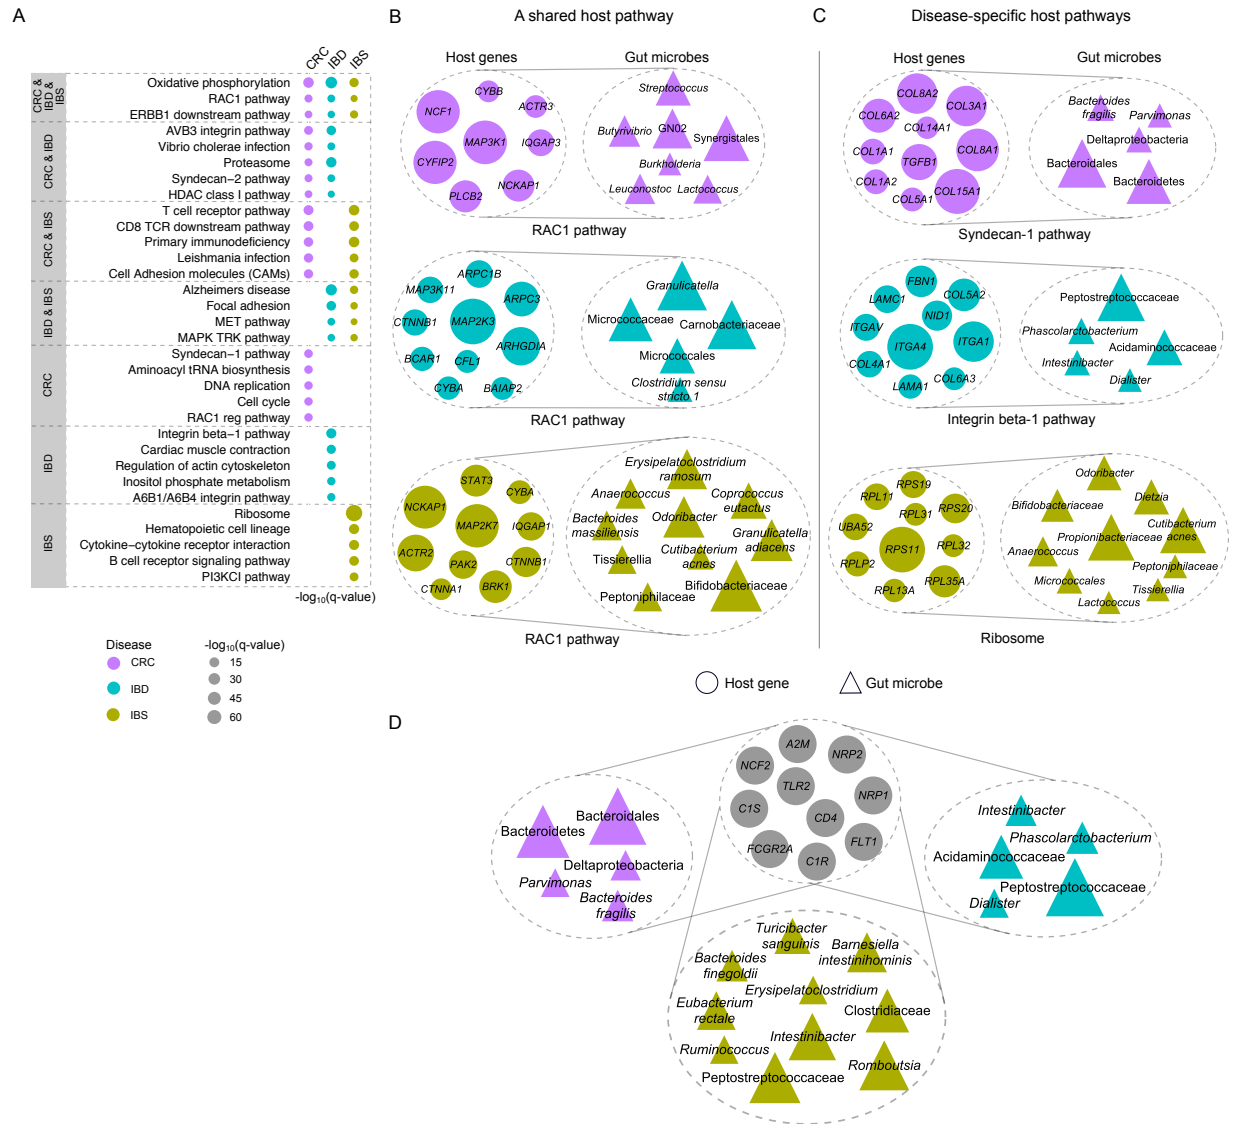

177  
 178 **Figure 2.** Shared immunoregulatory and metabolic host pathways associate with disease-  
 179 specific gut microbes across human diseases. **A.** Host pathways enriched for sparse CCA gene  
 180 sets associated with gut microbiome composition across diseases (FDR < 0.1). Size of the dots  
 181 represent the significance of enrichment for each pathway, and color of the dots denote the  
 182 disease cohort in which this pathway is significantly associated with microbiome composition. **B.**  
 183 Association between microbial taxa in CRC, IBD and IBS (top to bottom) and host genes in the  
 184 RAC1 pathway, a shared host pathway (i.e., a pathway for which host gene expression  
 185 correlates with gut microbes across disease cohorts). Size of circles and triangles represent the  
 186 absolute value of sparse CCA coefficients of genes and microbes, respectively. **C.** Association  
 187 between the set of host genes in disease-specific host pathways (i.e. host pathways for which  
 188 gene expression correlates with gut microbes in only one of the disease cohorts) and group of  
 189 gut bacteria in CRC, IBD and IBS (top to bottom). **D.** A common set of host genes (grey circles)

190 interact with disease-specific sets of microbes. These host genes are enriched for  
191 immunoregulatory and acute inflammatory response pathways.

192

193 We hypothesized that host genes and gut microbial taxa involved in common  
194 biological functions would act in a coordinated fashion, and, hence, would have  
195 correlated expression and abundance patterns. To investigate this, we used sparse  
196 CCA to characterize group-level association between host transcriptome and gut  
197 microbiome in each of the three diseases<sup>29,30</sup>. We fit the sparse CCA model for each  
198 dataset to identify subsets of significantly correlated host genes and gut microbes,  
199 known as components (see Methods, and Supplementary Tables S2–S4). We then  
200 performed pathway enrichment analysis on the set of host genes in each significant  
201 component to determine host pathways that interact with gut microbes in a disease. We  
202 identified *shared* pathways, namely host pathways for which gene expression correlates  
203 with gut microbes across disease cohorts, and *disease-specific* pathways, namely host  
204 pathways for which gene expression correlates with gut microbes in only one of the  
205 three disease cohorts (**Figure 2A**; Fisher's exact test, Benjamini-Hochberg FDR < 0.1,  
206 Supplementary Table S5). For simplicity, we focused on the top five most significant  
207 shared and disease-specific pathways (**Figure 2A**). We found three pathways shared  
208 across CRC, IBD, and IBS that are known to regulate gastrointestinal tract inflammation  
209 and gut barrier protection and repair. For example, oxidative phosphorylation, which is  
210 the process of energy metabolism in the mitochondria, is known to be upregulated in  
211 IBD and CRC, and contributes to tumorigenesis and drug resistance in CRC<sup>32–35</sup>.  
212 Interestingly, the gut microbiome can signal mitochondria of gut mucosal immune cells  
213 to alter mitochondrial metabolism, including oxidative phosphorylation processes; this  
214 can lead to impaired epithelial barrier function and chronic intestinal inflammation in IBD  
215 and CRC<sup>36</sup>. We also found overlapping host pathways between disease pairs (see  
216 CRC & IBD, CRC & IBS, and IBD & IBS in **Figure 2A**), including immunoregulatory  
217 pathways and cell-surface receptors like integrin pathway, cell and focal adhesion, and  
218 proteasome.

219

220 In addition, we identified 102 disease-specific host pathways that are associated  
221 with gut microbes, including 52 CRC-specific, 25 IBD-specific, and 25 IBS-specific  
222 pathways (Supplementary Table S5, **Figure 2A**). While IBD-specific host pathways  
223 include A6B1/A6B4 integrin pathway and Integrin beta-1 pathway that regulate  
224 leukocyte recruitment in GI inflammation<sup>37,38</sup>, IBS-specific pathways include immune  
225 response pathways, including B cell receptor signaling pathway, and ribosome pathway.

226

227 To better understand the host gene-microbe interactions that underlie common  
228 associations, we focused on the RAC1 pathway, where host gene expression is  
229 associated with microbiome composition in CRC, IBD, and IBS. The RAC1 pathway is  
230 known to regulate immune response and intestinal mucosal repair, and has previously

231 been implicated in IBD and CRC<sup>39–41</sup> (**Figure 2B**). As expected, we observed  
232 overlapping host genes for this shared pathway across the three diseases. However,  
233 the microbial taxa they are correlated with are disease-specific. In CRC, the RAC1  
234 pathway is associated with oral bacterial taxa such as *Streptococcus*, *Synergistales*,  
235 and *GN02*, where *Streptococcus* species are known to be associated with colorectal  
236 carcinogenesis<sup>42,43</sup>. In IBD, the RAC1 host pathway is associated with microbial taxa  
237 previously implicated in IBD, including *Granulicatella*<sup>44–46</sup>, and *Clostridium sensu stricto*  
238 *1*, a microbe associated with chronic enteropathy similar to IBD<sup>47</sup>. In IBS, this pathway  
239 is associated with bacteria such as *Bacteroides massiliensis*, that has been shown to be  
240 prevalent in colitis<sup>48</sup>, and *Bifidobacterium* and *Odoribacter*, that are known to be  
241 depleted in IBS<sup>49–52</sup>.

242  
243 To investigate disease-specific associations, we considered unique host pathways  
244 for which host gene expression correlates with gut microbes only in one of the three  
245 diseases (**Figure 2C**). For example, the Syndecan-1 pathway, which we found to be  
246 associated with gut microbial taxa only in CRC, has been previously shown to regulate  
247 the tumorigenic activity of cancer cells by altering extracellular matrix adhesion and cell  
248 morphology<sup>53–55</sup>. Host gene expression in this pathway is associated with microbial  
249 taxa such as *Parvimonas* and *Bacteroides fragilis* that are known to promote intestinal  
250 carcinogenesis and are considered biomarkers of CRC<sup>1,56–58</sup>. The integrin-1 pathway, a  
251 disease-specific host pathway in IBD, is found to be associated with  
252 *Peptostreptococcaceae*, *Intestinibacter*, and *Phascolarctobacterium*, microbial taxa that  
253 are have been implicated in IBD by previous studies<sup>59–62</sup>. To assess similarities in host  
254 gene components across diseases, we identified a set of host genes that are common  
255 between components across the three diseases, and we found that these genes are  
256 enriched for immune response pathways in gut epithelium, including vascular  
257 endothelial growth factor (VEGF), complementation and coagulation cascades, and  
258 cytokine-cytokine receptor interaction (**Figure 2D**; Fisher's exact test, Benjamini-  
259 Hochberg FDR < 0.1). While this set of host genes is associated with disease-specific  
260 groups of microbes, we also found overlapping microbes between IBD and IBS, such as  
261 *Peptostreptococcaceae* and *Intestinibacter*, taxa that are found in high abundance in  
262 gastrointestinal inflammation<sup>59,61,62</sup>.

263  
264 **Specific gut microbes interact with individual host genes and pathways in each**  
265 **disease**



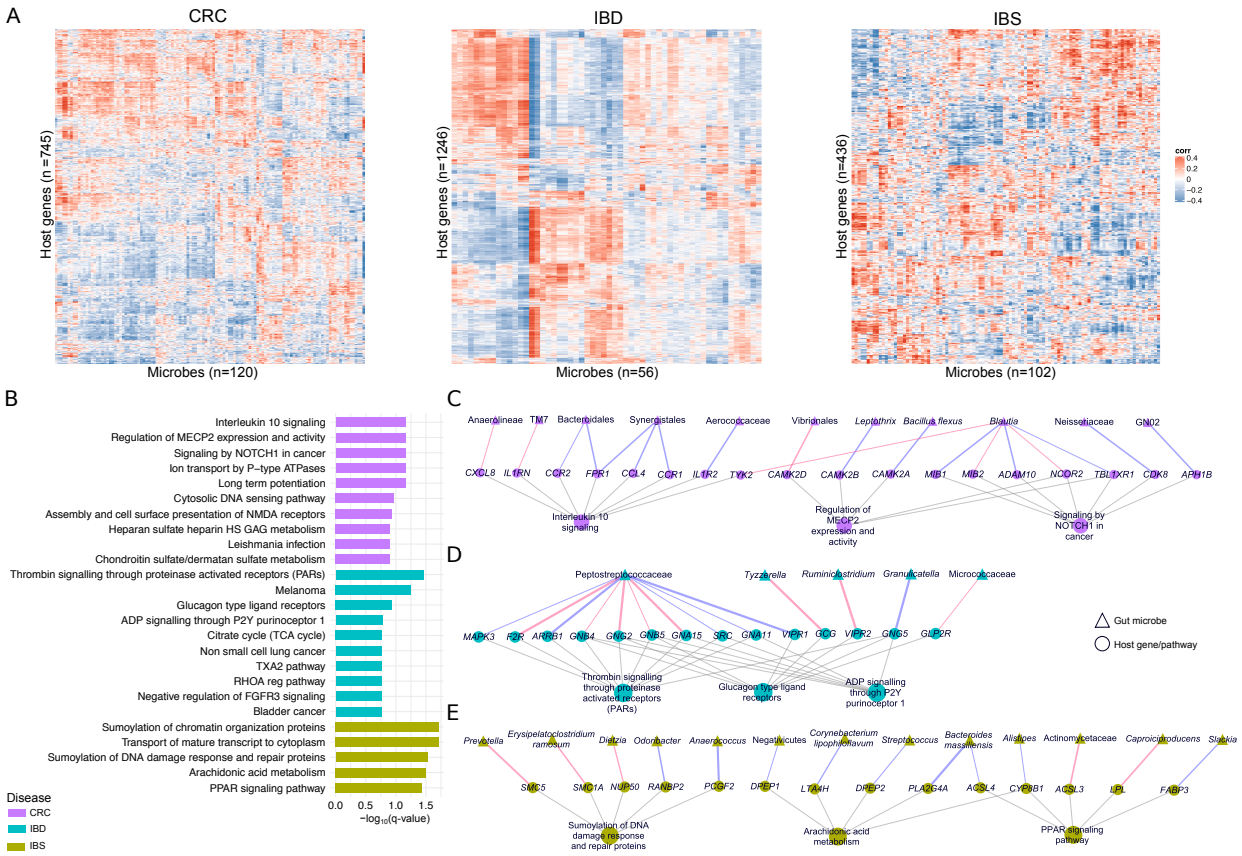

266

267

268 **Figure 3.** Specific gut microbes interact with individual host genes and pathways in each  
 269 disease. **A.** Heatmap showing the overall pattern of interactions between significant and  
 270 stability-selected host genes and gut microbial taxa identified by the Lasso model in CRC, IBD,  
 271 and IBS (FDR < 0.1). **B.** Host pathways enriched among genes that are correlated with specific  
 272 gut microbes in CRC (purple), IBD (green), and IBS (yellow). **C–D.** Networks showing specific  
 273 gut microbes correlated with specific host genes enriched for disease-specific host pathways in  
 274 CRC (**C**), IBD (**D**), and IBS (**E**). Triangular nodes represent gut microbes, circular nodes  
 275 represent host genes and pathways. Edge color represents positive (blue) or negative (red)  
 276 association, and edge width represents strength of association (spearman rho). Grey edges  
 277 represent host gene - pathway associations.

278

279 Previous studies have shown that specific microbial taxa can regulate expression of  
 280 individual host genes<sup>15,22</sup>. Therefore, we explored interactions between individual host  
 281 genes and gut microbes in each disease. To do so, we used Lasso penalized  
 282 regression models to identify specific gut microbial taxa whose abundance is associated  
 283 with the expression of a host gene<sup>31</sup>. We fit these models in a gene-wise manner, using  
 284 expression for each host gene as response and abundance of gut microbial taxa as  
 285 predictors. We then applied stability selection to identify robust associations (see  
 286 Methods). Using this approach, we found 755, 1295, and 441 significant and stability-  
 287 selected host gene-taxa associations in CRC, IBD, and IBS, respectively (**Figure 3**;

288 Tables S6–S8; FDR < 0.1). These represent interactions between 745 host genes and  
289 120 gut microbes in CRC (Supplementary Table S6), between 1246 host genes and 56  
290 gut microbes in IBD (Supplementary Table S7), and between 436 host genes and 102  
291 gut microbes in IBS (Supplementary Table S8) (**Figure 3A**). Examples of specific host  
292 gene-microbe interactions can be found in Supplementary Figure S2. Overall, we  
293 observed disease-specific patterns in host gene-taxa interactions.

294

295 To characterize the biological functions represented by the host genes that interact  
296 with specific gut microbes, we applied enrichment analysis on the set of gut microbiota-  
297 associated host genes in each disease (see Methods). This is complementary to our  
298 group-level approach (Figure 2) in that these host pathways are enriched among  
299 individual host gene-microbe pairs. We identified 87 host pathways that are unique to  
300 each disease, including 22 CRC-specific, 60 IBD-specific, and 5 IBS-specific pathways  
301 that interact with unique gut bacteria, of which we visualized top 10 most significant host  
302 pathways per disease (**Figure 3B**, Fisher's exact test, Benjamini-Hochberg FDR < 0.2,  
303 Supplementary Table S9, see Methods). The host pathways enriched for CRC-specific  
304 interactions are known to modulate tumor growth, progression and metastasis in CRC,  
305 such as Interleukin-10 signaling, signaling by *NOTCH1* in cancer, and regulation of  
306 MECP2 expression and activity<sup>63–66</sup>. The host pathways we identified as enriched for  
307 IBD-specific interactions are known to be responsible for maintenance of gastric  
308 mucosa integrity, inflammatory response, and host defence against invading pathogens,  
309 such as thrombin signalling through proteinase activated receptors (PARs), and  
310 glucagon type ligand receptors<sup>67,68</sup>. For IBS-specific interactions, the enriched host  
311 pathways identified here have been shown to regulate homeostasis of intestinal tissue  
312 and proinflammatory mechanisms in IBS, such as sumoylation of DNA damage  
313 response and repair proteins, and arachidonic acid metabolism<sup>69–71</sup>.

314

315 To characterize the potential mechanism of host gene-microbe interactions, we  
316 further investigated the gut microbial taxa associated with host genes in these pathways  
317 (**Figure 3C-E**). In CRC, we found that Anaerolineae and *TM7*, oral microbes that also  
318 inhabit the human gastrointestinal tract, and are known to promote oral and colorectal  
319 tumorigenesis<sup>72–76</sup>, are negatively correlated with host genes enriched for tumor-  
320 promoting Interleukin-10 signaling pathway, such *CXCL8* and *IL1RN* (**Figure 3C** and  
321 Supplementary Figure S2). *CXCL8* is known to be overexpressed in CRC, and *IL1RN* is  
322 centrally involved in immune and inflammatory response, and its polymorphisms are  
323 implicated in colorectal carcinogenesis<sup>77–79</sup>. Other host genes in Interleukin-10  
324 signaling, such as *CCR2* and *FPR1*, are positively correlated with Bacteroidales (**Figure**  
325 **3C** and Supplementary Figure S2). *CCR2* and *FPR1* are overexpressed in colorectal  
326 tumors, while Bacteroidales are enriched in CRC and associated with tumorigenesis<sup>80–  
327 82</sup>.

328

329 We observed that Peptostreptococcaceae, which is prevalent in patients with IBD  
330 <sup>62,83,84</sup>, is associated with multiple host genes and pathways in IBD (**Figure 3D**). For  
331 example, its abundance is positively correlated with the expression of host genes  
332 *MAPK3* and *VIPR1*, involved in thrombin signalling through proteinase activated  
333 receptors (PARs) and glucagon type ligand receptors pathways, respectively. *MAPK3* is  
334 known to play a role in progression and development of IBD, and *VIPR1* is over-  
335 expressed in inflamed mucosa <sup>85,86</sup>. The abundance of Micrococcaceae, which is known  
336 to be increased in IBD, is negatively associated with the expression of *GLP2R*, a  
337 glucagon receptor involved in maintenance of gut barrier integrity <sup>68,87</sup>. In IBS-specific  
338 interactions, we found that the levels of *Prevotella*, which is known to be  
339 overrepresented in individuals with loose stool, to be negatively associated with  
340 expression of *SMC5*, which is involved in the sumoylation pathway <sup>88,89,90</sup> (**Figure 3E**).  
341 Previous studies have shown that gut pathogens can target the host sumoylation  
342 machinery that regulates inflammatory cascade in epithelial cells in inflammatory bowel  
343 disease <sup>69</sup>. We also found the expression of *PLA2G4A*, a host gene that plays an  
344 important role in arachidonic acid metabolism and is an integral member of  
345 prostaglandin biosynthesis pathway that modulates gut epithelial homeostasis <sup>91,92</sup>, is  
346 positively correlated with the abundance of *Bacteroides massiliensis* in IBS, a gut  
347 microbe known to be prevalent in patients with gut malignancies, including ulcerative  
348 colitis and colorectal carcinoma <sup>48,93</sup> (**Figure 3E**). Taken together, these findings  
349 demonstrate that interactions between specific gut microbial taxa and specific host  
350 genes and pathways vary by disease state.

351

352 **Disease-specific gut microbe-host gene crosstalk**

A

Shared gut microbes

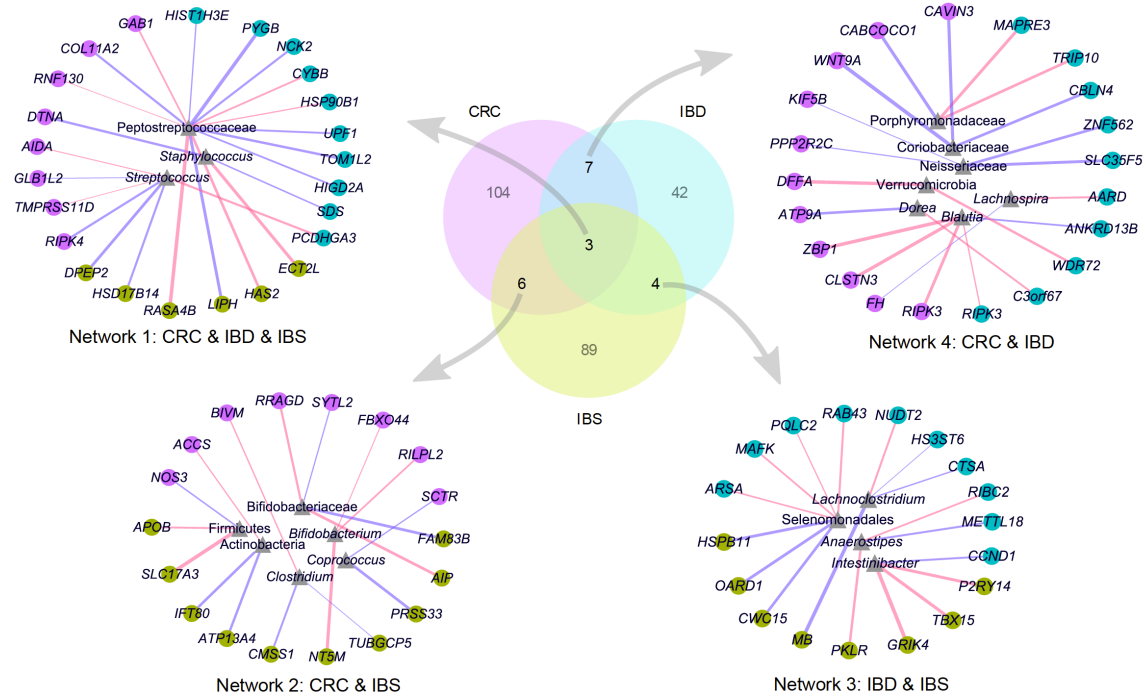

B

Shared host genes

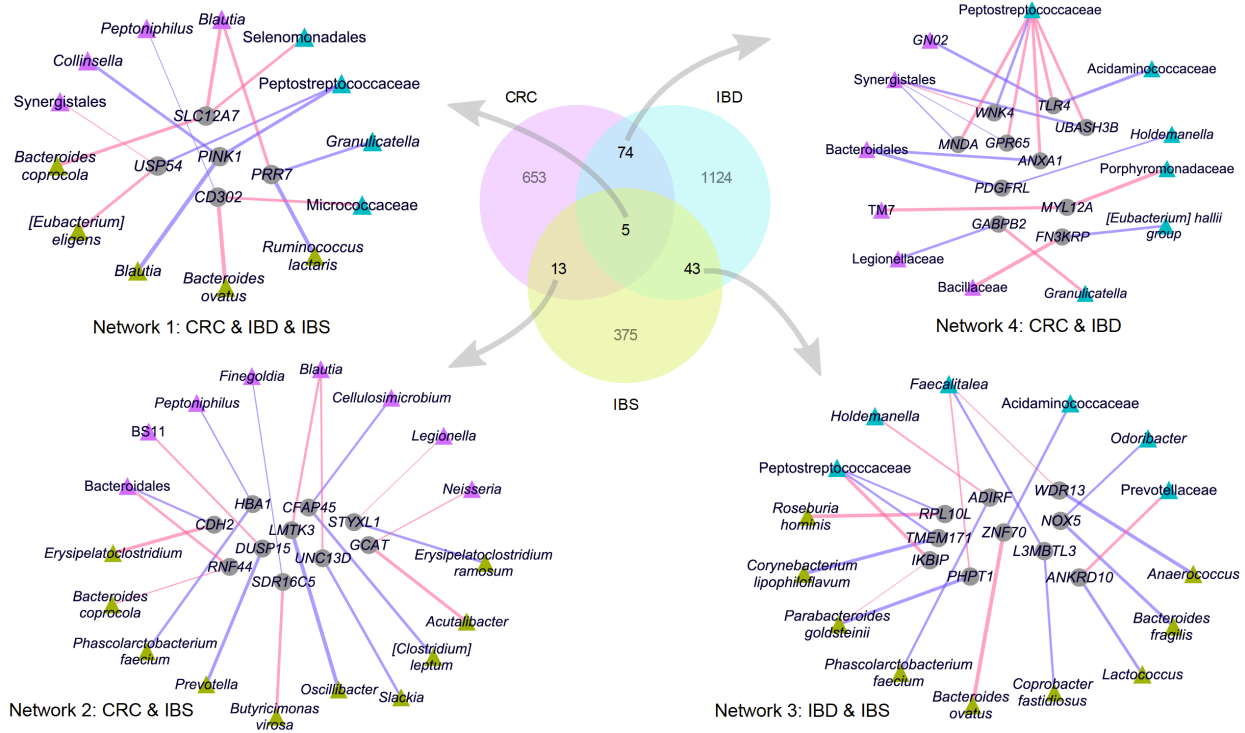

353  
354

355 **Figure 4.** Associations for shared gut microbes and shared host genes reveal disease-specific  
356 host-microbiome crosstalk. **A.** (*center*) Venn diagram showing overlap between gut microbes  
357 associated with host genes in CRC, IBD and IBS, (*counter-clockwise*) networks showing host  
358 gene-microbe interactions for gut microbes shared across CRC, IBD and IBS (**Network 1**),  
359 between CRC and IBS (**Network 2**), between IBD and IBS (**Network 3**), and between CRC and  
360 IBD (**Network 4**). **B.** (*center*) Venn diagram showing overlap between host genes associated  
361 with gut microbes in CRC, IBD, and IBS, (*counter-clockwise*) networks showing host gene-  
362 microbe interactions for host genes shared across CRC, IBD and IBS (**Network 1**), between  
363 CRC and IBS (**Network 2**), between IBD and IBS (**Network 3**), and between CRC and IBD  
364 (**Network 4**). Circular nodes represent host genes, triangular nodes represent gut microbes.  
365 Colored nodes represent specific disease (purple: CRC, green: IBD, yellow: IBS), grey nodes  
366 represent gut microbes (A) and host genes (B) shared across diseases. Edge color represents  
367 positive (blue) or negative (red) association, and edge width represents strength of association  
368 (spearman rho). All interactions were determined at FDR < 0.1.

369  
370 To understand how shared gut microbes may interact with specific host genes  
371 across diseases, we explored the overlaps between host gene-microbe associations in  
372 CRC, IBD, and IBS (**Figure 4A**, Lasso regression, Benjamini-Hochberg FDR < 0.1,  
373 Supplementary Table S10). We found that the abundance of 3 gut microbes,  
374 Peptostreptococcaceae, *Streptococcus*, and *Staphylococcus*, is correlated with host  
375 gene expression in all three diseases (**Figure 4A; Network 1**). Previous studies have  
376 revealed that Peptostreptococcaceae and *Streptococcus* spp. are found at elevated  
377 levels in CRC, IBD, and IBS<sup>8,43,62,94–97</sup>. While traditionally considered nasal- or skin-  
378 associated bacteria, *Staphylococcus* spp. also colonize the human gastrointestinal tract  
379 and include opportunistic pathogens that can cause acute intestinal infections in  
380 patients with CRC and IBD<sup>98–103</sup>, and are associated with increased risk of IBS and  
381 CRC<sup>97,103,104</sup>. We found that the abundance of Peptostreptococcaceae is positively  
382 correlated with the expression of host genes *PYGB* and *NCK2* in IBD, whereas it is  
383 negatively correlated with the expression of host gene *HAS2* in IBS. *PYGB* and *NCK2*  
384 are both upregulated in IBD, where *PYGB* is known to regulate Wnt/ $\beta$ -catenin pathway,  
385 and *NCK2* is involved in integrin and epidermal growth factor receptor signaling<sup>105–109</sup>.  
386 In contrast, *HAS2* is known to have a protective effect on the colonic epithelium through  
387 regulation of intestinal homeostasis and inflammation<sup>110–112</sup>. In CRC, we found that the  
388 abundance of Peptostreptococcaceae is negatively associated with the expression of  
389 *GAB1*, a host gene for which overexpression stimulates tumor growth in colon cancer  
390 cells<sup>113</sup>. *Streptococcus* also shows a disease-specific pattern of association with host  
391 gene expression. In CRC, its abundance is correlated with the expression of *RIPK4*,  
392 which regulates WNT signaling and NF- $\kappa$ B pathway, and is upregulated in several  
393 cancer types, including colon cancer<sup>114–116</sup>. Similarly, in IBS, *Streptococcus* abundance  
394 is correlated with the expression of *DPEP2*, which is known to modulate macrophage  
395 inflammatory response<sup>117</sup>, and is involved in arachidonic acid metabolism that is known  
396 to be dysregulated in IBS<sup>70,71</sup> (**Figure 4A; Network 1**).

397

398 To elucidate potential host gene-microbe interactions for gut microbes shared  
399 between diseases, we visualized networks of most significant associations (**Figure 4A;**  
400 **Networks 2–4**, Lasso regression, Benjamini-Hochberg FDR < 0.1, Supplementary  
401 Table S10). We found 20 microbes for which abundance is associated with the  
402 expression of host gene in at least two diseases. Notably, the abundance of *Blautia*, a  
403 butyrate-producing beneficial microbe, is found to be negatively correlated with the  
404 expression of *RIPK3* in both CRC and IBD (**Figure 4A; Network 4** and Supplementary  
405 Figure S3). *RIPK3* promotes intestinal inflammation in IBD, and colon tumorigenesis<sup>118–</sup>  
406<sup>122</sup>. Interestingly, in CRC, *Blautia* is also associated with *ZBP1* (**Figure 4A; Network 4**),  
407 a host gene that recruits *RIPK3* to induce NF-κB activation, and regulates innate  
408 immune response to mediate host defense against tumors and pathogens<sup>123–125</sup>.

409

410 Conversely, to explore how shared host genes may interact with gut microbes  
411 across all diseases, we identified host genes for which expression is correlated with the  
412 abundance of specific gut microbes in CRC, IBD, and IBS (**Figure 4B**, Lasso  
413 regression, FDR < 0.1, Supplementary Table S11). We identified 5 such host genes that  
414 interact with 4 gut microbes in CRC, 5 gut microbes in IBS, and 4 gut microbes in IBD  
415 (**Figure 4B; Network 1**, Supplementary Table S11). Of note, the expression of *PINK1*,  
416 a host gene that regulates mitochondrial homeostasis and activates PI3-kinase/AKT  
417 signaling, contributing to intestinal inflammation in IBD, and tumorigenesis<sup>126–128</sup>, is  
418 associated with the abundance of *Collinsella* in CRC, Peptostreptococcaceae in IBD,  
419 and *Blautia* in IBS. Previous studies have found that *Collinsella* is increased in  
420 abundance in CRC, and has been shown to induce inflammation via altering gut  
421 permeability<sup>129–131</sup>. However, *Blautia* has been found to be both positively and  
422 negatively correlated with IBS symptoms<sup>8,51,132</sup>.

423

424 In addition, we identified 135 host genes for which expression is associated with  
425 abundance of microbial taxa in at least two of the three diseases, and visualized the  
426 network of most significant associations (**Figure 4B; Networks 2–4**, Lasso regression,  
427 FDR < 0.1, Supplementary Table S11). We found that the host genes whose expression  
428 is correlated with gut microbes in both CRC and IBD are enriched for pathways involved  
429 in immune response, including natural killer cell mediated toxicity, *Leishmania* infection,  
430 and leukocyte transendothelial migration (**Figure 4B; Network 4**, Fisher's exact test,  
431 Benjamini-Hochberg FDR < 0.1). Some notable associations for these shared host  
432 genes include host genes and taxa previously implicated in CRC and IBD. For example,  
433 expression of Annexin A1 or *ANXA1*, a host gene known to regulate intestinal mucosal  
434 injury and repair and found dysregulated in CRC and IBD<sup>133–135</sup>, is positively correlated  
435 with Bacteroidales in CRC, while negatively correlated with Peptostreptococcaceae in  
436 IBD (**Figure 4B; Network 4**). Bacteroidales species are known to modulate maturation

437 of the host immune system and gut barrier integrity<sup>136,137</sup>. *TLR4*, a host gene known to  
438 modulate inflammatory response in intestinal epithelium through recognition of bacterial  
439 lipopolysaccharide<sup>138,139</sup>, and previously implicated in IBD and CRC<sup>140,141</sup>, is found  
440 associated with an oral microbe *GN02* in CRC<sup>142</sup>, whereas in IBD, it interacts with  
441 Acidaminococcaceae, a gut microbe found increased in abundance in patients with  
442 Crohn's disease<sup>143</sup> (**Figure 4B; Network 4**). Overall, our analysis shows that shared  
443 gut microbial taxa and shared host genes depict disease-specific host-microbe  
444 crosstalk, thus suggesting that the mechanism of host gene-microbiome interaction  
445 might be specific to the disease.

446

## 447 Discussion

448

449 While gut microbial communities and host gene expression have separately been  
450 implicated with human health and disease, the role of the interaction between gut  
451 microbes and host gene regulation in the pathogenesis of human gastrointestinal  
452 diseases remains largely unknown. Here, we comprehensively characterized  
453 interactions between gut microbiome composition and host gene expression from 416  
454 colonic mucosal samples taken from patients with colorectal cancer, inflammatory bowel  
455 disease, and irritable bowel syndrome, in addition to non-disease controls. To overcome  
456 the challenges associated with integrating high-dimensional multi-omic datasets, we  
457 developed and applied a machine learning framework to characterize interactions  
458 between the gut microbiome and host transcriptome in each disease. We identified a  
459 common set of host genes and pathways, including pathways that regulate  
460 gastrointestinal inflammation, gut barrier protection, and energy metabolism, that are  
461 associated with gut microbiome composition in all three diseases. We also found that  
462 gut microbes that have been previously associated with all three diseases, including  
463 *Streptococcus*, interact with different host pathways in each disease. This suggests that  
464 both common and disease-specific interplay between gut microbes and host gene  
465 regulation may contribute to the underlying pathophysiology of GI disorders.

466

467 Previous studies have found common microbial signatures across CRC, IBD, and  
468 IBS. For example, all three diseases exhibit an overrepresentation of  
469 Peptostreptococcaceae and *Streptococcus* spp<sup>8,43,62,95</sup>. In addition, both CRC and IBD  
470 microbiomes are denoted by a loss of butyrate producing gut bacteria, including *Blautia*,  
471 and an enrichment of enterotoxigenic *Bacteroides fragilis*<sup>5,58,95,144</sup>. In contrast to these  
472 microbiome similarities, host gene regulation shows distinct alterations across the three  
473 GI disorders; for example, unique antibacterial gene expression profile and disruption of  
474 purine salvage pathway are specific to IBS, deregulation of proinflammatory IL-23–IL-17  
475 signaling is unique to IBD, and prominent activation of oncogenic pathways like Notch  
476 and WNT signaling is a hallmark of CRC<sup>8,13,145,146</sup>. Here, we found that common

477 disease-related gut microbes can interact with host genes and pathways in a disease-  
478 specific manner. Thus, it is compelling to hypothesize that although diseases can be  
479 characterized by similar microbial perturbations, these microbes can impact different  
480 pathophysiological processes through interaction with different host genes in each  
481 disease. For example, we found that, in CRC, *Streptococcus* is correlated with the  
482 expression of host genes that regulate WNT signaling and NF- $\kappa$ B pathway, whereas in  
483 IBS, *Streptococcus* is correlated with host genes that modulate macrophage  
484 inflammatory response, thus suggesting that this gut microbe may perturb distinct host  
485 pathways in CRC and IBS. Of course, since our results are based on correlational  
486 analysis, it is challenging to assess directionality. While it is possible that these disease-  
487 specific interactions have a role in disease pathogenesis, it is also possible that the  
488 disease-transformed colonic mucosa renders it more conducive to the same microbial  
489 taxa.

490  
491 We also identified a common set of host genes and pathways that are associated  
492 with gut microbiome composition in all three diseases. These included pathways that  
493 regulate gastrointestinal inflammation, immune response, and energy metabolism, and  
494 have been previously implicated in these diseases<sup>33,147–149</sup>. Our analysis shows that  
495 these common host genes and pathways correlate with disease-specific gut microbes in  
496 CRC, IBD, and IBS. For example, the expression of host gene *PINK1* that regulates the  
497 PI3-kinase/AKT signaling pathway<sup>126</sup> is associated with the abundance of *Collinsella* in  
498 CRC, Peptostreptococcaceae in IBD, and *Blautia* in IBS. This suggests that in some  
499 cases, distinct gut microbes may modulate host genes and pathways that are commonly  
500 dysregulated across different gut pathologies. At the same time, we also found disease-  
501 specific host gene-microbe interactions. For example, in CRC, Syndecan-1 pathway, a  
502 host pathway that modulates tumor growth and progression, is correlated with microbial  
503 taxa such as *Parvimonas* and *Bacteroides fragilis* that are known to promote intestinal  
504 carcinogenesis<sup>53,56,57,63</sup>. These associations are not found in IBD or IBS, and are  
505 unique to CRC. Taken together, our results indicate that GI disorders are characterized  
506 by a complex network of interactions between microbes and host genes. Although these  
507 interactions can be disease-specific, we find cases where the same microbial taxon is  
508 associated with different host genes in each disease, and vice-versa: cases where the  
509 same host pathway is associated with different microbes in each disease. Although  
510 much effort in microbiome research has been directed towards identifying specific  
511 microbial taxa that are responsible for the pathogenesis of disease, our findings indicate  
512 that without incorporating data on host gene-microbe interactions, studies may be  
513 missing the full picture. Host omic data provides invaluable information on the potential  
514 mechanisms through which microbes can affect health.

515



516 An important contribution of our work is a machine learning-based integrative  
517 framework for characterization of complex host gene-microbe interactions across  
518 human diseases. Although few recent studies have investigated associations between  
519 host transcriptome and gut microbiome in human gut disorders, our analysis uses an  
520 innovative analytical technique that has several advantages<sup>24–27</sup>. First, as opposed to  
521 analyses that rely on calculating pairwise correlations between features (e.g. Dayama et  
522 al.), our approach does not require restricting the data to a predetermined subset of  
523 taxa or genes of interest to increase statistical power. In addition, compared to  
524 Procrustes analysis, which is commonly used for finding overall correspondence  
525 between paired datasets, our approach does not only detect overall association, but can  
526 also find specific associations between gut microbial taxa and host genes (using Lasso)  
527 and pathways (using sparse CCA), allowing identification of specific interactions and  
528 shedding light on potential biological mechanisms of interaction. Furthermore, our  
529 approach can be applied to other types of multi-omic dataset, including microbial  
530 metabolomic and metagenomic data<sup>8</sup>. Lastly, our project incorporates data from across  
531 several diseases, identifying commonalities across conditions as well as disease-  
532 specific patterns.

533  
534 Despite these advantages, our study has several limitations. While we report the  
535 potential role of host gene-microbiome interactions in the pathophysiology of GI  
536 disorders, our study identifies correlations, and we cannot infer causality here. Given  
537 the challenges associated with studying causal mechanisms in humans, future studies  
538 using cell culture or animal models would be useful in elucidating the causal role and  
539 directionality of interactions between the gut microbiome and host gene regulation in  
540 these diseases<sup>150</sup>. Another caveat of our study is that it includes three different disease  
541 cohorts with disparate sample collection and sequencing protocols, which can lead to  
542 potential batch effects. To mitigate this issue, we performed our integration analysis in  
543 each disease cohort separately, including cases and internal controls within each  
544 cohort. Additionally, our analysis focused only on the taxonomic composition of the  
545 microbiome, and hence we could not characterize interactions involving microbial genes  
546 and pathways. Lastly, there are several environmental variables that could potentially  
547 influence the microbiome, including diet and medication history, which are not available  
548 across our disease cohorts.

549  
550 Overall, our work demonstrates the power of integrating gut microbiome and host  
551 gene expression data to provide insights into their combined role in GI diseases,  
552 including CRC, IBD, and IBS. We find disease-specific and shared gut microbe-host  
553 gene interactions across these gut disorders, involving gut microbes and host genes  
554 implicated in gastrointestinal inflammation, gut barrier protection, and metabolic  
555 functions. We also found that the same gut microbes interact with different host genes

556 in different diseases, suggesting potential mechanisms by which similar gut microbes  
557 can affect different disease pathologies. These results represent an important step  
558 towards characterizing the crosstalk between gut microbiome and host gene regulation  
559 and understanding the contribution to disease etiology.

560

## 561 **Acknowledgements**

562

563 We would like to thank the IBD HMP2 consortium for making the dataset publicly  
564 available. We are thankful to the Blekhman Lab members for their comments and  
565 suggestions on the manuscript. We thank Dr. Wen Wang and Dr. Gabriel Al-Ghalith for  
566 their feedback. This work is supported by NIH grant R35-GM128716 (to R.B.), a  
567 University of Minnesota Doctoral Dissertation Fellowship (to S.P), and by NIH grant  
568 R01-GM130622 (to E.F.L). This work was carried out, in part, by resources provided by  
569 the Minnesota Supercomputing Institute.

## 570 **Methods**

571

### 572 **Overall study design, samples and data**

573 We obtained mucosal microbiome (16S rRNA) and host gene expression (RNA-seq)  
574 data from colonic mucosal biopsy samples collected from the patients from three  
575 disease cohorts: colorectal cancer (CRC), inflammatory bowel disease (IBD), and  
576 irritable bowel syndrome (IBS). Except the host gene expression (RNA-seq) data for  
577 CRC, all the other datasets were generated and described in detail in previous studies  
578 <sup>3,8,25</sup>. Below, we describe the sample collection, sequencing, and quality control for host  
579 RNA-seq data for CRC cohort, and summarize data acquisition process for other  
580 datasets:

581

### 582 **CRC samples and data**

583 We used 88 pairs of colonic mucosal samples from 44 patients, with primary tumor  
584 and normal tissue samples from each individual. These samples were characterized  
585 and described in a previous study <sup>3</sup>. Detailed cohort characteristics are included in  
586 Supplementary Table S1.

587

588 Host RNA-seq sequencing, alignment and quality control. Total RNA was extracted  
589 using a previously established protocol <sup>3,151</sup>. Approximately 100mg of flash-frozen tissue  
590 per sample were lysed by placing the tissue in 1mL of Qiazol lysis reagent (Qiagen Inc.,  
591 Valencia, CA, USA) and sonicating in a 65° C water bath for 1-2 hours. Nucleic acids  
592 were purified from the lysates using the Qiagen AllPrep DNA/RNA mini kit (Qiagen Inc.,  
593 Valencia, CA, USA), quantified using a Nanodrop 2000 spectrophotometer (Thermo  
594 Fisher Scientific, Waltham, MA USA), and submitted for RNA sequencing to the  
595 University of Minnesota Genomics Center. Total eukaryotic RNA isolates were  
596 quantified using a fluorimetric RiboGreen assay, and once the samples passed the  
597 initial QC step ( $\geq 1$  microgram and RIN  $\geq 8$ ), they were converted to Illumina sequencing  
598 libraries using Illumina's TruSeq Stranded Total RNA Library Prep (for details, see  
599 [www.illumina.com](http://www.illumina.com)). Truseq libraries were hybridized to a paired-end flow cell and  
600 individual fragments were clonally amplified by bridge amplification on the Illumina cBot.  
601 Once clustering was complete, the flow cell was loaded on the HiSeq 2500 and  
602 sequenced using Illumina's SBS chemistry. Base call (.bcl) files for each cycle of  
603 sequencing were generated by Illumina Real Time Analysis (RTA) software. Primary  
604 analysis and index de-multiplexing are performed using Illumina's bcl2fastq v2.20.0.422,  
605 which output the demultiplexed FASTQ files.

606

607 A quality check of raw sequence FASTQ files was performed using FastQC software  
608 (version 0.11.5) <sup>152</sup>. Quality trimming was performed to remove sequence adaptors and  
609 low quality bases using Trimmomatic with 3bp sliding window trimming from 3' end

610 requiring minimum Q16 (phred33)<sup>153</sup>. FastQC was run on the resulting trimmed files to  
611 ensure good quality of sequences. The paired-end reads were mapped to NCBI v38 *H.*  
612 *sapiens* reference genome using HISAT2<sup>154</sup>, resulting in an average alignment rate of  
613 87.11% overall for 88 samples. We obtained a range of read counts between  
614 14,365,657 and 31,530,487 aligned reads per sample, with an average of 22,475,688.2  
615 and 22,697,605.5 aligned reads per sample. SAMtools was used for sorting and  
616 indexing the aligned bam files. After alignment, the *Subread* package (version 1.4.6)  
617 within the *featureCounts* program was used to generate transcript abundance file<sup>155</sup>  
618 (Supplementary Figure S4).

619

620 16S rRNA data acquisition. The microbiome dataset used in this study was generated  
621 and characterized previously<sup>3</sup>. We used the unnormalized and unfiltered OTU table in  
622 tab-delimited format, representing mucosal microbiome data from 44 tumor and 44  
623 patient-matched colon tissue samples.

624

### 625 **IBD samples and data**

626 We used previously generated and described host gene expression (RNA-seq) and  
627 mucosal gut microbiome (16S rRNA) data for the IBD cohort generated as part of the  
628 HMP2 project<sup>25,28</sup> (for detailed protocols, see <http://ibdmdb.org/protocols>). These  
629 include data from colonic biopsy samples collected from 78 individuals, including 56  
630 individuals with IBD, and 22 individuals without IBD (“non-IBD” in HMP2). Out of 56 IBD  
631 patients, 34 patients had Crohn’s disease (CD) and 22 patients had ulcerative colitis  
632 (UC). Detailed cohort characteristics are included in Supplementary Table S1. We  
633 downloaded metadata, host RNA-seq data, and microbiome data for these samples  
634 from <http://ibdmdb.org> in July 2018. We downloaded the unnormalized and unfiltered  
635 OTU table and host transcript read counts files in tab-delimited format. We describe the  
636 filtering and preprocessing steps for host gene expression and microbiome data below.

637

### 638 **IBS samples and data**

639 We used previously generated and characterized host gene expression (RNA-seq)  
640 and mucosal gut microbiome (16S rRNA) data for the IBS cohort<sup>8</sup>. These include data  
641 from colonic biopsy samples collected from 42 individuals, including 29 individuals with  
642 IBS, and 13 healthy individuals (non-IBS). Detailed cohort characteristics are included in  
643 Supplementary Table S1. We obtained the unnormalized and unfiltered OTU table and  
644 host transcript read count files in tab-delimited format via personal communication with  
645 authors of the paper<sup>8</sup>. For some individuals, samples were collected at two time points.  
646 For these cases, we averaged the gene expression levels and microbiome abundance  
647 measurements across the two time points. This is supported by a recent study showing  
648 that “omics” methods are more accurate when using averages over multiple sampling

649 time points<sup>156</sup>. We describe the filtering and preprocessing steps for host gene  
650 expression and microbiome data below.

651

### 652 **Preprocessing host gene expression data**

653 For host gene expression data for each disease cohort, we used *biomaRt* R  
654 package (version 2.37.4) to only keep data for protein-coding genes<sup>157</sup>. We filtered out  
655 low expressed genes to retain genes that are expressed in at least half of the samples  
656 in each disease cohort. We performed variance stabilizing transformation using the R  
657 package *DESeq2* (version 1.14.1) on the filtered gene expression read count data<sup>158</sup>.  
658 We filtered out genes with low variance, using 25% quantile of variance across samples  
659 in each disease cohort as cutoff. Performing these steps for RNA-seq data for each  
660 disease cohort separately resulted in a unique host gene expression matrix per disease  
661 for downstream analysis, including 12513 genes in the CRC dataset, 11985 genes in  
662 IBD dataset, and 12429 genes in IBS dataset.

663

### 664 **Preprocessing microbiome data**

665 We performed the following steps for microbiome data from each disease cohort  
666 separately. First, sequences that were classified as either having originated from  
667 archaea, chloroplasts, known contaminants originating from laboratory reagents or kits,  
668 and soil or water-associated environmental contaminants were removed from the OTU  
669 table as described previously<sup>159</sup>. Next, we summarized the OTU table at the species (if  
670 present), genus, family, order, class, and phylum taxonomic levels, and performed  
671 prevalence and abundance-based filtering to retain taxa found at 0.001 relative  
672 abundance in at least 10% of the samples. We then concatenated these summarized  
673 taxa matrices (count data) into one combined taxa matrix for each disease dataset. We  
674 applied centered log ratio (CLR) transform on the filtered taxa count matrix to account  
675 for compositionality effects. These steps resulted in a taxonomic abundance matrix for  
676 each disease cohort, which included 235 taxa in the CRC dataset, 121 taxa in the IBD  
677 dataset, and 238 taxa in the IBS dataset.

678

### 679 **Procrustes analysis**

680 To assess overall correspondence between host gene regulation and gut  
681 microbiome composition in CRC, IBD, and IBS, we performed Procrustes analysis in R  
682 using the *vegan* package (version 2.4-5)<sup>160</sup>. For each disease cohort, we used  
683 Aitchison's distance on host gene expression data and Bray Curtis distance on gut  
684 microbiome data as input to the Procrustes analysis<sup>161</sup>. The significance of rotation  
685 agreement was obtained using the *protest()* function with 9,999 permutations.

686

### 687 **Sparse Canonical Correlation Analysis**

688 We used sparse canonical correlation analysis (sparse CCA) to identify group-level  
689 correlations between paired host gene expression and gut microbiome data in each  
690 disease cohort. Canonical correlation analysis (CCA) identifies linear projection of two  
691 sets of observations into shared latent space that maximizes correlation between the  
692 two datasets<sup>162</sup>. Sparse CCA is adapted from CCA for high dimensional settings to  
693 incorporate feature selection by utilizing  $L1$  or lasso penalty in CCA<sup>29</sup>. The objective  
694 function of sparse CCA can be expressed as follows:

$$695 \quad \text{maximize}_{u,v} u^T X^T Y v \text{ subject to } u^T X^T X u \leq 1, v^T Y^T Y v \leq 1, \|u\|_1 \leq \lambda_1, \|v\|_1 \leq \lambda_2$$

696  
697 where,  $X$  and  $Y$  denote two data matrices with same number of samples, but different  
698 number of features (representing gut microbiome taxonomic composition data and host  
699 gene expression data, respectively);  $u$  and  $v$  are canonical loading vectors of  $X$  and  $Y$   
700 respectively;  $\lambda_1$  and  $\lambda_2$  control lasso penalties of  $u$  and  $v$ , respectively.  
701  
702

703 For each disease cohort separately, we applied sparse CCA using R (version 3.3.3)  
704 package *PMA* (version 1.1) with gut microbiome taxonomic composition and host gene  
705 expression as two sets of variables to be correlated<sup>163</sup>. Below, we describe details on  
706 hyperparameter tuning, fitting sparse CCA models, computing significance of correlation  
707 for sparse CCA components, enrichment analysis, and visualization of sparse CCA  
708 output.  
709

### 710 **Hyperparameter tuning and fitting for Sparse CCA model**

711 We performed hyperparameter tuning to identify the sparsity penalty parameters for  
712 gut microbiome abundance ( $\lambda_1$ ) and host gene expression ( $\lambda_2$ ) data. Since the  
713 permutation search provided in the *PMA* package only performs a one-dimensional  
714 search in the tuning parameter space, we implemented a grid-search approach using  
715 leave-one-out cross-validation in R (version 3.3.3) for hyperparameter tuning. We  
716 selected penalty parameters which had the highest correlation under cross-validation.  
717 Using this approach, we identified  $\lambda_1$  as 0.15 and  $\lambda_2$  as 0.2 for CRC data,  $\lambda_1$  as 0.177  
718 and  $\lambda_2$  as 0.333 for IBD data,  $\lambda_1$  as 0.4 and  $\lambda_2$  as 0.1 for IBS data.  
719

720 After identifying sparsity parameters, we fit the sparse CCA model to obtain subsets  
721 of correlated host genes and gut microbes, known as components. Each sparse CCA  
722 component includes non-zero weights (or canonical loadings) on gut microbes, and  
723 non-zero weights on a subset of host genes correlated with those gut microbes to  
724 capture joint variation in the two sets of observations. We computed the first 10 sparse  
725 CCA components for each disease cohort, performing a separate computation for case  
726 and control samples. Sparse CCA components are computed iteratively, informed by

727 previously computed components, thus, resulting in uncorrelated components<sup>164</sup>. Next,  
728 we assessed the significance of sparse CCA components as described below.

729

### 730 **Significance of correlation for sparse CCA components**

731 We computed the significance of each pair of canonical variables (or a component)  
732 using leave-one-out cross-validation approach in R (version 3.3.3). For a given  
733 component, we first used the penalty parameters determined above to compute the  
734 sparse CCA output with one sample held out. We then computed the scores for the  
735 held-out sample, i.e., we computed  $scoreX_i = X_i u_{-i}$  and  $scoreY_i = Y_i v_{-i}$ , where  $i$  is  
736 the held-out sample,  $X_i$  and  $Y_i$  denote the values for  $i^{th}$  sample of the input data  
737 matrices  $X$  and  $Y$ , and  $u_{-i}$  and  $v_{-i}$  are the canonical loadings estimated from the  
738 sparse CCA computation without the  $i^{th}$  sample. We repeated this  $n$  times, where  $n$  is  
739 the total number of samples in the data, to obtain the vector of held-out scores. To  
740 assess the true strength of association and its significance, we used  $cor.test()$  on the  
741 scores computed for the held-out samples. We corrected the p-values for multiple  
742 hypothesis testing using Benjamini-Hochberg (FDR) method within each disease cohort,  
743 and determined significant components at  $FDR < 0.1$ .

744

745 Using this approach, we identified 7 significant components in CRC, with an average  
746 of 828 host genes and 8 gut microbes; 4 significant components in IBD, with an average  
747 of 2095 host genes and 6 gut microbes; and 6 significant components in IBS, with an  
748 average of 577 host genes and 61 gut microbes ( $FDR < 0.1$ , Supplementary Tables S2-  
749 S4).

750

### 751 **Enrichment analysis for sparse CCA**

752 To characterize host pathways enriched for the set of host genes associated with  
753 microbes in each component, we implemented an enrichment analysis in R (version  
754 3.3.3). We implemented Fisher's exact test to assess pathway enrichment, where we  
755 used the set of host genes input to the sparse CCA analysis as background genes, and  
756 set of host genes in a component as the genes of interest. We used KEGG and PID  
757 gene sets from MsigDB canonical pathways collection<sup>165,166</sup>. To avoid pathways that  
758 are too large to provide any specific biological insights or too small to provide adequate  
759 statistical power, we excluded any pathway with either (1) fewer than 25 genes, (2)  
760 more than 300 genes, or (3) fewer than 5 genes that overlapped between the genes of  
761 interest and the pathway. We combined the set of enriched host pathways for all  
762 significant components for a given disease dataset, corrected for multiple hypothesis  
763 testing within each disease cohort using Benjamini-Hochberg (FDR) approach, and  
764 determined significant host pathways at  $FDR < 0.1$ . This analysis was performed  
765 separately for case and control data for each disease.

766

767 To identify case-specific host pathways, we used a two-part approach: (1) first, we  
768 identified pathways that are only significantly enriched in cases (FDR < 0.1) and not in  
769 controls. (2) In addition, we identified pathways that are significant in both the cases and  
770 controls at FDR < 0.1. For these pathways, we performed differential enrichment in  
771 cases versus controls by implementing a comparative log odds-ratio approach in R  
772 <sup>167,168</sup>. To do so, we first computed the z-score for the odds ratio for  $i$ -th pathway in  
773 cases:

$$774 z_{i,case} = \log(\delta_i)/SE(\delta_i)$$

776 where,  $\delta_i$  is the odds-ratio for  $i$ -th pathway in cases, and  $SE(\delta_i)$  is the standard error for  
777  $i$ -th pathway in cases, which is computed using the four elements,  $n_1$  to  $n_4$ , of the 2x2  
778 contingency table used in the enrichment analysis for the  $i$ -th pathway as follows:  
779

$$780 SE(\delta_i) = \sqrt{1/n_1 + 1/n_2 + 1/n_3 + 1/n_4}$$

782 Similarly, we computed  $z_{i,ctrl}$  for the same pathway in the controls. For a given  
783 pathway, we compare enrichment for the component that gives highest significance for  
784 the cases with that which gives highest significance for the controls. Next, we compute  
785 a comparative log odds-ratio for  $i$ -th pathway overlapping between cases and controls  
786 as follows:  
787

$$788 z_{i,case-ctrl} = \frac{\log(\delta_{i,case}) - \log(\delta_{i,ctrl})}{SE(\delta_{i,case,ctrl})}$$

790 The greater the value of  $z_{i,case-ctrl}$ , the greater the odds a pathway is differentially  
791 enriched in case versus control than by chance. P-values were inferred assuming  
792 normal approximations, and corrected for multiple hypothesis testing using Benjamini-  
793 Hochberg (FDR) approach. As the last step of part (2), we retained pathways that were  
794 differentially enriched in cases versus controls at FDR < 0.2. Finally, we combined the  
795 pathways from part (1) and (2) to obtain case-specific pathways.  
796

### 797 **Visualizing disease-specific and shared host pathways and components from** 798 **sparse CCA**

801 To determine *shared* host pathways, i.e. host pathways for which gene expression  
802 correlates with gut microbes across all three disease cohorts, and *disease-specific* host  
803 pathways, i.e. host pathways for which gene expression correlates with gut microbes in  
804 only one of the three disease cohorts, we computed overlaps between significant case-  
805 specific host pathways determined above across the three disease cohorts. Given the



806 overlap across the curated gene sets from MsigDB, we controlled for redundancy  
807 across pathways for visualization purposes. To do this, we identified similar pathways  
808 based on their relative overlap in terms of the set of genes using an overlap coefficient.  
809 The overlap coefficient between two pathways is defined as the number of common  
810 genes between the pathways divided by the number of genes in the pathway with fewer  
811 genes. Specifically, the overlap coefficient is represented as follows:  
812

$$813 \quad \text{overlap}(X, Y) = \frac{|X \cap Y|}{\min(|X|, |Y|)}$$

814  
815 For the top 15 most significant host pathways (FDR < 0.1) discovered for each  
816 shared and disease-specific set (Supplementary Table S12), we computed pairwise  
817 similarity between pathways as overlap coefficients and used a maximum allowed  
818 similarity score of 0.5 as a cutoff. Using the pairs of pathways that satisfied the cutoff,  
819 we computed the connected components to identify clusters of overlapping pathways.  
820 For visualization purposes, we selected a representative pathway from each connected  
821 component, prioritising the pathway with the highest number of genes (Figure 2A,  
822 Supplementary Table S4). We visualized host pathway enrichment using the R package  
823 *ggplot* (version 3.2.1).  
824

825 For visualizing components corresponding to selected host pathways or common  
826 host genes across diseases (Figures 2B – D), we ordered host genes and taxa by their  
827 absolute coefficients in the component, and selected the top 10 host genes and taxa for  
828 representation. If multiple taxa originating from the same lineage occurred in a  
829 component, we selected the one with the highest coefficient to reduce redundancy, thus  
830 representing the taxa with most contribution from a given lineage. The size of host  
831 genes and gut microbial taxa are scaled by the absolute value of their corresponding  
832 coefficients in a given component. All sparse CCA components were visualized using  
833 Cytoscape (version 3.5.1) <sup>169</sup>.  
834

### 835 **Lasso regression analysis**

836 We used Lasso penalized regression to identify specific interactions between  
837 individual host genes and gut microbial taxa within each disease cohort <sup>31</sup>. We  
838 implemented a gene-wise model using expression for each host gene as response and  
839 abundances of microbiome taxa as predictors, to identify microbial taxa that are  
840 correlated with a host gene. An ordinary least squares (OLS) regression is not suitable  
841 for this task, since OLS results in unstable solutions under high-dimensional settings or  
842 when  $p \gg n$ , i.e. number of predictors  $p$  is much larger than number of samples  $n$ .  
843 Additionally, we expect the abundance of only a few microbial taxa to correlate with the  
844 expression of each host gene. To address this, we used lasso regression, which is

845 similar to multivariate OLS, except that it uses shrinkage or regularization to perform  
846 variable selection, thus picking only a few taxa that associate with a host gene's  
847 expression.

848

849 To account for other factors that can impact host gene expression or microbiome  
850 composition, each model also included covariates in the predictor matrix (i.e.  
851 microbiome abundance table) for gender (male or female), disease-subtype for IBD  
852 (Crohn's Disease or ulcerative colitis), disease-subtype for IBS (constipation (IBS-C) or  
853 diarrhea (IBS-D)).

854

855 The lasso model estimates the lasso regression coefficient  $\hat{\beta}$  by minimizing the  
856 following:

$$857 \quad \sum_{i=1}^n (y_i - \beta_0 - \sum_{j=1}^p \beta_j x_{ij})^2 + \lambda \sum_{j=1}^p |\beta_j|$$

858 where,  $n$ = number of samples;  $p$ = number of predictors (taxa and other covariates);  
859  $1 \leq i \leq n, 1 \leq j \leq p$ ;  $y$  = response (host gene expression);  $x$  = predictor (taxa  
860 abundance and other covariates);  $\lambda$ = tuning parameter,  $\lambda \geq 0$ .

861

862 In addition to minimizing the residual sum of squares (first term in the equation),  
863 lasso minimizes the  $l_1$  norm of the coefficients (second term in the equation), which has  
864 an effect of forcing some of the coefficients to zero as the value of tuning parameter,  $\lambda$ ,  
865 increases. Thus, lasso performs feature or variable selection that leads to sparse  
866 models.

867

868 We implemented a lasso regression framework using R (version 3.3.3) package  
869 `glmnet` (version 2.0-13), which uses cyclical coordinate descent to compute  
870 regularization path<sup>170</sup>. Our framework executes a lasso regression for each host gene's  
871 expression as response and abundances of microbial taxa and values of other  
872 covariates as predictors. We used leave-one-out cross-validation to estimate the tuning  
873 parameter,  $\lambda$ , which was used to fit the final model on a given disease dataset.

874

875 We then performed inference for the lasso model using a regularized projection  
876 approach known as desparsified lasso. The desparsified lasso uses the asymptotic  
877 normality of a bias-corrected version of the lasso estimator to obtain 95% confidence  
878 intervals and p-values for the coefficient of each predictor (microbe) associated with a  
879 given host gene<sup>171</sup>. We used the R package `hdi` (version 0.1-7) that implements the  
880 desparsified lasso approach for estimation of confidence intervals and hypothesis  
881 testing in high dimensional and sparse settings<sup>171,172</sup>. We then corrected for multiple  
882 hypothesis testing using Benjamini-Hochberg (FDR) method.

883

## 884 **Stability selection for Lasso model**

885 Since the lasso model is sensitive to small variations of the predictor variable, we  
886 used stability selection to pick out robust microbes associated with a host gene <sup>173</sup>.

887 Stability selection is a resampling-based method that can be combined with different  
888 variable selection procedures in high dimensional settings, including lasso. Briefly,  
889 stability selection with lasso proceeds as follows:

890

891 Step 1. Select a random subset of the data.

892 Step 2. Fit the lasso model with a randomly perturbed penalty term in the  
893 neighborhood of the “best” penalty  $\lambda$ . Record the set of selected variables (microbes).

894 Step 3. Repeat steps 1) and 2)  $K$  times.

895 Step 4. Compute the frequency of selection,  $f_i$  per variable (microbe) across all trials.

896 Step 5. Select the variables (microbes) that are selected with a frequency of at least  
897  $f_{thr}$ , a pre-specified threshold value. Thus, we select a set of stable variables  
898 (microbes) such that  $f_i \geq f_{thr}$ .

899

900 The overall idea is that, if the same variables (microbes) are repeatedly selected when  
901 the parameters are perturbed, then they are robust variables. Stability selection also  
902 controls for family-wise error rate, thus controlling for false positives in addition to the  
903 FDR approach mentioned above <sup>173</sup>. In our analysis, we used the R package *stabs*  
904 (version 0.6-3) to perform stability selection <sup>174</sup>. Specifically, we used the following  
905 parameters in the process described above: in Step 1, a random subset of size  $n/2$  of  
906 data is selected, where  $n$  is total number of samples, in Step 3,  $K = 100$ , and in Step 5,  
907  $f_{thr} = 0.6$ , i.e. a predictor (microbe) selected in at least 60% of the fitted models is  
908 considered stable. The choice of these parameters are in accordance with the proposal  
909 of stability selection by Meinshausen and Bühlmann <sup>173</sup>.

910

911 Finally, we performed an intersection between associations identified by stability  
912 selection here and associations identified at  $FDR < 0.1$  by the lasso model described  
913 above. We removed any host gene-gender and host gene-disease-subtype associations  
914 to obtain the significant and stability selected host gene-microbe associations at  $FDR <$   
915  $0.1$ .

916

## 917 **Parallel execution of lasso analysis on supercomputing nodes**

918 We implemented a parallel framework for executing the gene-wise lasso analysis,  
919 where we parallelized execution of lasso models on host genes across multiple nodes  
920 and cores on a compute cluster from Minnesota Supercomputing Institute. We used job  
921 arrays to parallelize our analysis on multiple nodes on the cluster. Additionally, we used

922 R packages *doParallel* (version 1.0.15) and *foreach* (version 1.4.7) to run parallel  
923 processes on multiple cores of each compute node.

924

### 925 **Enrichment analysis for lasso output**

926 To characterize biological functions for the host genes that were found associated  
927 with specific gut microbes in a disease cohort by the lasso framework, we implemented  
928 an enrichment analysis in R (version 3.3.3) using Fisher's exact test. We used the set of  
929 expressed genes input to the lasso analysis as the background genes, and the set of  
930 host genes associated with gut microbes in a patient samples as genes of interest. We  
931 used the KEGG, PID, and REACTOME gene sets from MsigDB canonical pathways  
932 collection <sup>165,166</sup>. To avoid too large or too small pathways, we excluded from our  
933 analysis any pathway with fewer than 25 genes, greater than 85 genes, or fewer than 5  
934 genes that overlap between the genes of interest and the pathway. The p-values  
935 obtained from Fisher's exact test were adjusted for multiple testing using Benjamini-  
936 Hochberg (FDR) approach. We identified 87 host pathways that are unique to each  
937 disease, including 22 CRC-specific, 60 IBD-specific, and 5 IBS-specific pathways that  
938 interact with unique gut bacteria (FDR < 0.2, Supplementary Table S8). Here, we used  
939 a more relaxed FDR threshold of 0.2 to present a larger number of biologically relevant  
940 host pathways.

941

### 942 **Visualization of shared genes and taxa interactions for lasso output**

943 In Figure 4, we visualized host gene-microbe interactions for gut microbes and host  
944 genes shared across diseases. For visualizing interactions for shared gut microbes  
945 (Figure 4A), we identified shared microbes between all possible overlaps between  
946 diseases (Figure 4A; Networks 1–4), host genes that interact with these common  
947 microbes in each disease, and all interactions involving these microbes and genes in  
948 each disease (FDR < 0.1). Next, we grouped gene-taxa interactions identified per  
949 disease by shared taxa, sorted them by FDR value, and picked top gene-taxa  
950 association per shared taxa until we obtained at most 10 interactions per disease (FDR  
951 < 0.1, Supplementary Table S9).

952

953 Similarly, for visualizing interactions for shared host genes (Figure 4B), we identified  
954 shared host genes between all possible overlaps between diseases (Figure 4B;  
955 Networks 1–4), and host gene-taxa interactions per disease for these host genes  
956 shared across diseases. We sorted the interactions by FDR adjusted q-values (ordered  
957 first by q-value in CRC associations, followed by q-value in IBD associations, and finally  
958 by q-value in IBS associations, depending on the overlapping set under consideration).  
959 We picked top 10 genes from this merged output, and identified at most top 10  
960 associations involving these genes in each disease for the overlapping set under  
961 consideration (FDR < 0.1, Supplementary Table S10). Since lasso gives biased

962 estimates of the coefficients, we used Spearman correlation coefficient ( $\rho$ ) to depict  
963 strength of association for visualizing host gene-taxa associations. All the associations  
964 in Figure 4 were visualized using Cytoscape v3.5.1, where shared features are in grey  
965 and disease-specific features in disease-specific colors <sup>169</sup>.

966

## 967 **Data and Software Availability**

968

969 Raw data for host RNA-seq for CRC cohort is available on the NCBI Sequence  
970 Read Archive (SRA) under submission ID: SUB9143781. For raw data from 16S rRNA  
971 sequencing for CRC cohort, RNA-seq and 16S rRNA sequencing for IBD cohort, and  
972 RNA-seq and 16S rRNA sequencing for IBS cohort, please refer to data accession  
973 details published previously <sup>8,25,28</sup>. Processed data tables for host transcriptomics and  
974 microbiome data for each disease cohort have been included as supplemental tables  
975 (Supplementary Tables S13–S18). Code used for integration analyses performed in the  
976 paper is available at:

977 [https://github.com/blekhmanlab/host\\_gene\\_microbiome\\_interactions](https://github.com/blekhmanlab/host_gene_microbiome_interactions)

978

## 979 **Ethics statement**

980

981 For the colorectal cancer cohort, all research conformed to the Helsinki Declaration  
982 and was approved by the University of Minnesota Institutional Review Board, protocol  
983 1310E44403. For the inflammatory bowel disease and irritable bowel syndrome cohorts,  
984 ethical approval is described in their respective publications <sup>8,25,28</sup>.

985

## 986 **Declaration of Interests**

987

988 D.K. serves as Senior Scientific Advisor to Diversigen, a company involved in the  
989 commercialization of microbiome analysis. P.C.K. is an ad hoc consultant for Otsuka  
990 Pharmaceuticals, Pendulum Therapeutics, IP group inc. and Novome Biotechnologies.

991

## 992 **References**

- 993 1. Sobhani, I. *et al.* Colorectal cancer-associated microbiota contributes to oncogenic  
994 epigenetic signatures. *Proc. Natl. Acad. Sci. U. S. A.* **116**, 24285–24295 (2019).
- 995 2. Castellarin, M. *et al.* Fusobacterium nucleatum infection is prevalent in human  
996 colorectal carcinoma. *Genome Res.* **22**, 299–306 (2012).
- 997 3. Burns, M. B., Lynch, J., Starr, T. K., Knights, D. & Blekhman, R. Virulence genes

- 998 are a signature of the microbiome in the colorectal tumor microenvironment.  
999 *Genome Med.* **7**, 55 (2015).
- 1000 4. Irrazábal, T., Belcheva, A., Girardin, S. E., Martin, A. & Philpott, D. J. The  
1001 multifaceted role of the intestinal microbiota in colon cancer. *Mol. Cell* **54**, 309–320  
1002 (2014).
- 1003 5. Swidsinski, A., Weber, J., Loening-Baucke, V., Hale, L. P. & Lochs, H. Spatial  
1004 Organization and Composition of the Mucosal Flora in Patients with Inflammatory  
1005 Bowel Disease. *Journal of Clinical Microbiology* vol. 43 3380–3389 (2005).
- 1006 6. McIlroy, J., Ianiro, G., Mukhopadhyay, I., Hansen, R. & Hold, G. L. Review article:  
1007 the gut microbiome in inflammatory bowel disease-avenues for microbial  
1008 management. *Aliment. Pharmacol. Ther.* **47**, 26–42 (2018).
- 1009 7. Distrutti, E., Monaldi, L., Ricci, P. & Fiorucci, S. Gut microbiota role in irritable  
1010 bowel syndrome: New therapeutic strategies. *World J. Gastroenterol.* **22**, 2219–  
1011 2241 (2016).
- 1012 8. Mars, R. A. T. *et al.* Longitudinal Multi-omics Reveals Subset-Specific Mechanisms  
1013 Underlying Irritable Bowel Syndrome. *Cell* **0**, (2020).
- 1014 9. Schatoff, E. M., Leach, B. I. & Dow, L. E. Wnt Signaling and Colorectal Cancer.  
1015 *Curr. Colorectal Cancer Rep.* **13**, 101–110 (2017).
- 1016 10. Koveitypour, Z. *et al.* Signaling pathways involved in colorectal cancer progression.  
1017 *Cell Biosci.* **9**, 97 (2019).
- 1018 11. Pedersen, J., Coskun, M., Soendergaard, C., Salem, M. & Nielsen, O. H.  
1019 Inflammatory pathways of importance for management of inflammatory bowel  
1020 disease. *World J. Gastroenterol.* **20**, 64–77 (2014).

- 1021 12. Khor, B., Gardet, A. & Xavier, R. J. Genetics and pathogenesis of inflammatory  
1022 bowel disease. *Nature* **474**, 307–317 (2011).
- 1023 13. Bennet, S. M. P. *et al.* Altered intestinal antibacterial gene expression response  
1024 profile in irritable bowel syndrome is linked to bacterial composition and immune  
1025 activation. *Neurogastroenterol. Motil.* **30**, e13468 (2018).
- 1026 14. Nichols, R. G. & Davenport, E. R. The relationship between the gut microbiome and  
1027 host gene expression: a review. *Hum. Genet.* (2020) doi:10.1007/s00439-020-  
1028 02237-0.
- 1029 15. Camp, J. G. *et al.* Microbiota modulate transcription in the intestinal epithelium  
1030 without remodeling the accessible chromatin landscape. *Genome Res.* **24**, 1504–  
1031 1516 (2014).
- 1032 16. Sommer, F., Nookaew, I., Sommer, N., Fogelstrand, P. & Bäckhed, F. Site-specific  
1033 programming of the host epithelial transcriptome by the gut microbiota. *Genome*  
1034 *Biol.* **16**, 62 (2015).
- 1035 17. Pan, W.-H. *et al.* Exposure to the gut microbiota drives distinct methylome and  
1036 transcriptome changes in intestinal epithelial cells during postnatal development.  
1037 *Genome Med.* **10**, 27 (2018).
- 1038 18. Davison, J. M. *et al.* Microbiota regulate intestinal epithelial gene expression by  
1039 suppressing the transcription factor Hepatocyte nuclear factor 4 alpha. *Genome*  
1040 *Res.* **27**, 1195–1206 (2017).
- 1041 19. Murdoch, C. C. & Rawls, J. F. Commensal Microbiota Regulate Vertebrate Innate  
1042 Immunity-Insights From the Zebrafish. *Front. Immunol.* **10**, 2100 (2019).
- 1043 20. Broderick, N. A., Buchon, N. & Lemaitre, B. Microbiota-induced changes in

- 1044 drosophila melanogaster host gene expression and gut morphology. *MBio* **5**,  
1045 e01117–14 (2014).
- 1046 21. Richards, A. L. *et al.* Genetic and transcriptional analysis of human host response  
1047 to healthy gut microbiota. *mSystems* **1**, (2016).
- 1048 22. Richards, A. L. *et al.* Gut Microbiota Has a Widespread and Modifiable Effect on  
1049 Host Gene Regulation. *mSystems* **4**, (2019).
- 1050 23. Morgan, X. C. *et al.* Associations between host gene expression, the mucosal  
1051 microbiome, and clinical outcome in the pelvic pouch of patients with inflammatory  
1052 bowel disease. *Genome Biol.* **16**, 67 (2015).
- 1053 24. Häslér, R. *et al.* Uncoupling of mucosal gene regulation, mRNA splicing and  
1054 adherent microbiota signatures in inflammatory bowel disease. *Gut* **66**, 2087–2097  
1055 (2017).
- 1056 25. Lloyd-Price, J. *et al.* Multi-omics of the gut microbial ecosystem in inflammatory  
1057 bowel diseases. *Nature* **569**, 655–662 (2019).
- 1058 26. Flemer, B. *et al.* Tumour-associated and non-tumour-associated microbiota in  
1059 colorectal cancer. *Gut* **66**, 633–643 (2017).
- 1060 27. Dayama, G., Priya, S., Niccum, D. E., Khoruts, A. & Blekhman, R. Interactions  
1061 between the gut microbiome and host gene regulation in cystic fibrosis. *Genome*  
1062 *Med.* **12**, 12 (2020).
- 1063 28. Integrative HMP (iHMP) Research Network Consortium. The Integrative Human  
1064 Microbiome Project. *Nature* **569**, 641–648 (2019).
- 1065 29. Witten, D. M., Tibshirani, R. & Hastie, T. A penalized matrix decomposition, with  
1066 applications to sparse principal components and canonical correlation analysis.



- 1067        *Biostatistics* **10**, 515–534 (2009).
- 1068    30. Witten, D. M. & Tibshirani, R. J. Extensions of sparse canonical correlation analysis  
1069        with applications to genomic data. *Stat. Appl. Genet. Mol. Biol.* **8**, Article28 (2009).
- 1070    31. Tibshirani, R. Regression Shrinkage and Selection via the Lasso. *J. R. Stat. Soc.*  
1071        *Series B Stat. Methodol.* **58**, 267–288 (1996).
- 1072    32. Hanahan, D. & Weinberg, R. A. Hallmarks of cancer: the next generation. *Cell* **144**,  
1073        646–674 (2011).
- 1074    33. Huang, Q. *et al.* LYRM2 directly regulates complex I activity to support tumor  
1075        growth in colorectal cancer by oxidative phosphorylation. *Cancer Lett.* **455**, 36–47  
1076        (2019).
- 1077    34. Lin, C.-S. *et al.* Role of mitochondrial function in the invasiveness of human colon  
1078        cancer cells. *Oncol. Rep.* **39**, 316–330 (2018).
- 1079    35. Vellinga, T. T. *et al.* SIRT1/PGC1 $\alpha$ -Dependent Increase in Oxidative  
1080        Phosphorylation Supports Chemotherapy Resistance of Colon Cancer. *Clin.*  
1081        *Cancer Res.* **21**, 2870–2879 (2015).
- 1082    36. Jackson, D. N. & Theiss, A. L. Gut bacteria signaling to mitochondria in intestinal  
1083        inflammation and cancer. *Gut Microbes* 1–20 (2019).
- 1084    37. Dotan, I. *et al.* The role of integrins in the pathogenesis of inflammatory bowel  
1085        disease: Approved and investigational anti-integrin therapies. *Med. Res. Rev.* **40**,  
1086        245–262 (2020).
- 1087    38. Integrins: Signalling and Disease. in *eLS* (ed. John Wiley & Sons Ltd) vol. 11 48  
1088        (John Wiley & Sons, Ltd, 2001).
- 1089    39. Seinen, M. L., van Nieuw Amerongen, G. P., de Boer, N. K. H. & van Bodegraven,

- 1090 A. A. Rac Attack: Modulation of the Small GTPase Rac in Inflammatory Bowel  
1091 Disease and Thiopurine Therapy. *Mol. Diagn. Ther.* **20**, 551–557 (2016).
- 1092 40. Kotelevets, L. & Chastre, E. Rac1 Signaling: From Intestinal Homeostasis to  
1093 Colorectal Cancer Metastasis. *Cancers* **12**, (2020).
- 1094 41. Muise, A. M. *et al.* Single nucleotide polymorphisms that increase expression of the  
1095 guanosine triphosphatase RAC1 are associated with ulcerative colitis.  
1096 *Gastroenterology* **141**, 633–641 (2011).
- 1097 42. Abdulamir, A. S., Hafidh, R. R. & Abu Bakar, F. The association of *Streptococcus*  
1098 *bovis/gallolyticus* with colorectal tumors: the nature and the underlying mechanisms  
1099 of its etiological role. *J. Exp. Clin. Cancer Res.* **30**, 11 (2011).
- 1100 43. Aymeric, L. *et al.* Colorectal cancer specific conditions promote *Streptococcus*  
1101 *gallolyticus* gut colonization. *Proc. Natl. Acad. Sci. U. S. A.* **115**, E283–E291  
1102 (2018).
- 1103 44. Qiu, Z. *et al.* Targeted Metagenome Based Analyses Show Gut Microbial Diversity  
1104 of Inflammatory Bowel Disease patients. *Indian J. Microbiol.* **57**, 307–315 (2017).
- 1105 45. Dinakaran, V. *et al.* Identification of Specific Oral and Gut Pathogens in Full  
1106 Thickness Colon of Colitis Patients: Implications for Colon Motility. *Front. Microbiol.*  
1107 **9**, 3220 (2018).
- 1108 46. Ma, H.-Q., Yu, T.-T., Zhao, X.-J., Zhang, Y. & Zhang, H.-J. Fecal microbial  
1109 dysbiosis in Chinese patients with inflammatory bowel disease. *World J.*  
1110 *Gastroenterol.* **24**, 1464–1477 (2018).
- 1111 47. Wang, S. *et al.* Diet-induced remission in chronic enteropathy is associated with  
1112 altered microbial community structure and synthesis of secondary bile acids.

- 1113        *Microbiome* **7**, 126 (2019).
- 1114    48. Lucke, K., Miehlike, S., Jacobs, E. & Schuppler, M. Prevalence of Bacteroides and  
1115        Prevotella spp. in ulcerative colitis. *J. Med. Microbiol.* **55**, 617–624 (2006).
- 1116    49. Pittayanon, R. *et al.* Gut Microbiota in Patients With Irritable Bowel Syndrome-A  
1117        Systematic Review. *Gastroenterology* **157**, 97–108 (2019).
- 1118    50. Duboc, H. *et al.* Increase in fecal primary bile acids and dysbiosis in patients with  
1119        diarrhea-predominant irritable bowel syndrome: Bile acids and dysbiosis in IBS-D  
1120        patients. *Neurogastroenterology & Motility* **24**, 513–e247 (2012).
- 1121    51. Rajilić-Stojanović, M. *et al.* Global and deep molecular analysis of microbiota  
1122        signatures in fecal samples from patients with irritable bowel syndrome.  
1123        *Gastroenterology* **141**, 1792–1801 (2011).
- 1124    52. Jeffery, I. B. *et al.* An irritable bowel syndrome subtype defined by species-specific  
1125        alterations in faecal microbiota. *Gut* **61**, 997–1006 (2012).
- 1126    53. Szatmári, T., Ötvös, R., Hjerpe, A. & Dobra, K. Syndecan-1 in Cancer: Implications  
1127        for Cell Signaling, Differentiation, and Prognostication. *Dis. Markers* **2015**, 796052  
1128        (2015).
- 1129    54. Vicente, C. M. *et al.* Heparan Sulfate Proteoglycans in Human Colorectal Cancer.  
1130        *Anal. Cell. Pathol.* **2018**, 8389595 (2018).
- 1131    55. Wei, H.-T., Guo, E.-N., Dong, B.-G. & Chen, L.-S. Prognostic and clinical  
1132        significance of syndecan-1 in colorectal cancer: a meta-analysis. *BMC*  
1133        *Gastroenterol.* **15**, 152 (2015).
- 1134    56. Purcell, R. V., Visnovska, M., Biggs, P. J., Schmeier, S. & Frizelle, F. A. Distinct gut  
1135        microbiome patterns associate with consensus molecular subtypes of colorectal

- 1136 cancer. *Sci. Rep.* **7**, 11590 (2017).
- 1137 57. Haghi, F., Goli, E., Mirzaei, B. & Zeighami, H. The association between fecal  
1138 enterotoxigenic *B. fragilis* with colorectal cancer. *BMC Cancer* **19**, 879 (2019).
- 1139 58. Ulger Toprak, N. *et al.* A possible role of *Bacteroides fragilis* enterotoxin in the  
1140 aetiology of colorectal cancer. *Clin. Microbiol. Infect.* **12**, 782–786 (2006).
- 1141 59. Forbes, J. D. *et al.* A comparative study of the gut microbiota in immune-mediated  
1142 inflammatory diseases—does a common dysbiosis exist? *Microbiome* vol. 6 (2018).
- 1143 60. Knights, D., Lassen, K. G. & Xavier, R. J. Advances in inflammatory bowel disease  
1144 pathogenesis: linking host genetics and the microbiome. *Gut* **62**, 1505–1510  
1145 (2013).
- 1146 61. Morgan, X. C. *et al.* Dysfunction of the intestinal microbiome in inflammatory bowel  
1147 disease and treatment. *Genome Biol.* **13**, R79 (2012).
- 1148 62. Lavelle, A. *et al.* Spatial variation of the colonic microbiota in patients with  
1149 ulcerative colitis and control volunteers. *Gut* **64**, 1553–1561 (2015).
- 1150 63. Mager, L. F., Wasmer, M.-H., Rau, T. T. & Krebs, P. Cytokine-Induced Modulation  
1151 of Colorectal Cancer. *Front. Oncol.* **6**, 96 (2016).
- 1152 64. Fender, A. W., Nutter, J. M., Fitzgerald, T. L., Bertrand, F. E. & Sigounas, G. Notch-  
1153 1 promotes stemness and epithelial to mesenchymal transition in colorectal cancer.  
1154 *J. Cell. Biochem.* **116**, 2517–2527 (2015).
- 1155 65. Reedijk, M. *et al.* Activation of Notch signaling in human colon adenocarcinoma. *Int.*  
1156 *J. Oncol.* **33**, 1223–1229 (2008).
- 1157 66. Luo, D. & Ge, W. MeCP2 Promotes Colorectal Cancer Metastasis by Modulating  
1158 ZEB1 Transcription. *Cancers* **12**, (2020).

- 1159 67. Sébert, M., Sola-Tapias, N., Mas, E., Barreau, F. & Ferrand, A. Protease-Activated  
1160 Receptors in the Intestine: Focus on Inflammation and Cancer. *Front. Endocrinol.*  
1161 **10**, 717 (2019).
- 1162 68. Duan, L., Rao, X., Braunstein, Z., Toomey, A. C. & Zhong, J. Role of Incretin Axis  
1163 in Inflammatory Bowel Disease. *Front. Immunol.* **8**, 1734 (2017).
- 1164 69. Mustafa, S. A. *et al.* SUMOylation pathway alteration coupled with downregulation of  
1165 SUMO E2 enzyme at mucosal epithelium modulates inflammation in inflammatory  
1166 bowel disease. *Open Biol.* **7**, (2017).
- 1167 70. Clarke, G. *et al.* Marked elevations in pro-inflammatory polyunsaturated fatty acid  
1168 metabolites in females with irritable bowel syndrome. *J. Lipid Res.* **51**, 1186–1192  
1169 (2010).
- 1170 71. Nielsen, O. H., Ahnfelt-Rønne, I. & Elmgreen, J. Abnormal metabolism of  
1171 arachidonic acid in chronic inflammatory bowel disease: enhanced release of  
1172 leucotriene B4 from activated neutrophils. *Gut* **28**, 181–185 (1987).
- 1173 72. Campbell, A. G. *et al.* Diversity and genomic insights into the uncultured Chloroflexi  
1174 from the human microbiota. *Environ. Microbiol.* **16**, 2635–2643 (2014).
- 1175 73. Shao, T. *et al.* Combined Signature of the Fecal Microbiome and Metabolome in  
1176 Patients with Gout. *Front. Microbiol.* **8**, 268 (2017).
- 1177 74. Idris, A., Hasnain, S. Z., Huat, L. Z. & Koh, D. Human diseases, immunity and the  
1178 oral microbiota—Insights gained from metagenomic studies. *Oral Science*  
1179 *International* **14**, 27–32 (2017).
- 1180 75. Narayanan, V., Peppelenbosch, M. P. & Konstantinov, S. R. Human fecal  
1181 microbiome-based biomarkers for colorectal cancer. *Cancer Prev. Res.* **7**, 1108–

- 1182            1111 (2014).
- 1183    76. Lu, Y. *et al.* Mucosal adherent bacterial dysbiosis in patients with colorectal  
1184            adenomas. *Sci. Rep.* **6**, 26337 (2016).
- 1185    77. Li, J. *et al.* Transcriptional Profiling Reveals the Regulatory Role of CXCL8 in  
1186            Promoting Colorectal Cancer. *Front. Genet.* **10**, 1360 (2019).
- 1187    78. Viet, H. T., Wågsäter, D., Hugander, A. & Dimberg, J. Interleukin-1 receptor  
1188            antagonist gene polymorphism in human colorectal cancer. *Oncol. Rep.* **14**, 915–  
1189            918 (2005).
- 1190    79. Burada, F. *et al.* IL-1RN +2018T>C polymorphism is correlated with colorectal  
1191            cancer. *Mol. Biol. Rep.* **40**, 2851–2857 (2013).
- 1192    80. Wolf, M. J. *et al.* Endothelial CCR2 signaling induced by colon carcinoma cells  
1193            enables extravasation via the JAK2-Stat5 and p38MAPK pathway. *Cancer Cell* **22**,  
1194            91–105 (2012).
- 1195    81. Li, S.-Q. *et al.* The Expression of Formyl Peptide Receptor 1 is Correlated with  
1196            Tumor Invasion of Human Colorectal Cancer. *Sci. Rep.* **7**, 5918 (2017).
- 1197    82. Baxter, N. T., Zackular, J. P., Chen, G. Y. & Schloss, P. D. Structure of the gut  
1198            microbiome following colonization with human feces determines colonic tumor  
1199            burden. *Microbiome* **2**, 20 (2014).
- 1200    83. Chen, L. *et al.* Characteristics of fecal and mucosa-associated microbiota in  
1201            Chinese patients with inflammatory bowel disease. *Medicine* **93**, e51 (2014).
- 1202    84. Gao, X. *et al.* Chronic stress promotes colitis by disturbing the gut microbiota and  
1203            triggering immune system response. *Proc. Natl. Acad. Sci. U. S. A.* **115**, E2960–  
1204            E2969 (2018).

- 1205 85. Li, X. L. *et al.* Bioinformatic analysis of potential candidates for therapy of  
1206 inflammatory bowel disease. *Eur. Rev. Med. Pharmacol. Sci.* **19**, 4275–4284  
1207 (2015).
- 1208 86. Yukawa, T. *et al.* Differential expression of vasoactive intestinal peptide receptor 1  
1209 expression in inflammatory bowel disease. *Int. J. Mol. Med.* **20**, 161–167 (2007).
- 1210 87. Imhann, F. *et al.* Interplay of host genetics and gut microbiota underlying the onset  
1211 and clinical presentation of inflammatory bowel disease. *Gut* **67**, 108–119 (2018).
- 1212 88. Potts, P. R. & Yu, H. The SMC5/6 complex maintains telomere length in ALT  
1213 cancer cells through SUMOylation of telomere-binding proteins. *Nat. Struct. Mol.*  
1214 *Biol.* **14**, 581–590 (2007).
- 1215 89. Vandeputte, D. *et al.* Stool consistency is strongly associated with gut microbiota  
1216 richness and composition, enterotypes and bacterial growth rates. *Gut* **65**, 57–62  
1217 (2016).
- 1218 90. Su, T. *et al.* Altered Intestinal Microbiota with Increased Abundance of *Prevotella* Is  
1219 Associated with High Risk of Diarrhea-Predominant Irritable Bowel Syndrome.  
1220 *Gastroenterol. Res. Pract.* **2018**, 6961783 (2018).
- 1221 91. Pazmandi, J., Kalinichenko, A., Ardy, R. C. & Boztug, K. Early-onset inflammatory  
1222 bowel disease as a model disease to identify key regulators of immune  
1223 homeostasis mechanisms. *Immunol. Rev.* **287**, 162–185 (2019).
- 1224 92. Schewe, M. *et al.* Secreted Phospholipases A2 Are Intestinal Stem Cell Niche  
1225 Factors with Distinct Roles in Homeostasis, Inflammation, and Cancer. *Cell Stem*  
1226 *Cell* **19**, 38–51 (2016).
- 1227 93. Feng, Q. *et al.* Gut microbiome development along the colorectal adenoma–

- 1228 carcinoma sequence. *Nat. Commun.* **6**, 6528 (2015).
- 1229 94. Gagnière, J. *et al.* Gut microbiota imbalance and colorectal cancer. *World J.*  
1230 *Gastroenterol.* **22**, 501–518 (2016).
- 1231 95. Chen, W., Liu, F., Ling, Z., Tong, X. & Xiang, C. Human intestinal lumen and  
1232 mucosa-associated microbiota in patients with colorectal cancer. *PLoS One* **7**,  
1233 e39743 (2012).
- 1234 96. Kojima, A. *et al.* Infection of specific strains of *Streptococcus mutans*, oral bacteria,  
1235 confers a risk of ulcerative colitis. *Sci. Rep.* **2**, 332 (2012).
- 1236 97. Bennet, S. M. P., Ohman, L. & Simren, M. Gut microbiota as potential orchestrators  
1237 of irritable bowel syndrome. *Gut Liver* **9**, 318–331 (2015).
- 1238 98. Piewngam, P. *et al.* Pathogen elimination by probiotic *Bacillus* via signalling  
1239 interference. *Nature* **562**, 532–537 (2018).
- 1240 99. Acton, D. S., Plat-Sinnige, M. J. T., van Wamel, W., de Groot, N. & van Belkum, A.  
1241 Intestinal carriage of *Staphylococcus aureus*: how does its frequency compare with  
1242 that of nasal carriage and what is its clinical impact? *Eur. J. Clin. Microbiol. Infect.*  
1243 *Dis.* **28**, 115–127 (2009).
- 1244 100. Bettenworth, D. *et al.* Crohn's disease complicated by intestinal infection with  
1245 methicillin-resistant *Staphylococcus aureus*. *World J. Gastroenterol.* **19**, 4418–4421  
1246 (2013).
- 1247 101. Chiba, M. *et al.* *Staphylococcus aureus* in inflammatory bowel disease. *Scand. J.*  
1248 *Gastroenterol.* **36**, 615–620 (2001).
- 1249 102. Attiê, R., Chinen, L. T. D., Yoshioka, E. M., Silva, M. C. F. & de Lima, V. C. C.  
1250 Acute bacterial infection negatively impacts cancer specific survival of colorectal



- 1251 cancer patients. *World J. Gastroenterol.* **20**, 13930–13935 (2014).
- 1252 103.Noguchi, N. *et al.* Specific clones of *Staphylococcus lugdunensis* may be  
1253 associated with colon carcinoma. *J. Infect. Public Health* **11**, 39–42 (2018).
- 1254 104.Rinttilä, T., Lyra, A., Krogius-Kurikka, L. & Palva, A. Real-time PCR analysis of  
1255 enteric pathogens from fecal samples of irritable bowel syndrome subjects. *Gut*  
1256 *Pathog.* **3**, 6 (2011).
- 1257 105.Comelli, E. M. *et al.* Biomarkers of human gastrointestinal tract regions. *Mamm.*  
1258 *Genome* **20**, 516–527 (2009).
- 1259 106.Xia, B., Zhang, K. & Liu, C. PYGB Promoted Tumor Progression by Regulating  
1260 Wnt/ $\beta$ -Catenin Pathway in Gastric Cancer. *Technol. Cancer Res. Treat.* **19**,  
1261 1533033820926592 (2020).
- 1262 107.Xu, H., Cao, H. & Xiao, G. Signaling via PINCH: Functions, binding partners and  
1263 implications in human diseases. *Gene* **594**, 10–15 (2016).
- 1264 108.Hehlhans, S., Haase, M. & Cordes, N. Signalling via integrins: implications for cell  
1265 survival and anticancer strategies. *Biochim. Biophys. Acta* **1775**, 163–180 (2007).
- 1266 109.Burczynski, M. E. *et al.* Molecular classification of Crohn's disease and ulcerative  
1267 colitis patients using transcriptional profiles in peripheral blood mononuclear cells.  
1268 *J. Mol. Diagn.* **8**, 51–61 (2006).
- 1269 110.de la Motte, C. A. Hyaluronan in intestinal homeostasis and inflammation:  
1270 implications for fibrosis. *Am. J. Physiol. Gastrointest. Liver Physiol.* **301**, G945–9  
1271 (2011).
- 1272 111.Kim, Y. & de la Motte, C. A. The Role of Hyaluronan Treatment in Intestinal Innate  
1273 Host Defense. *Front. Immunol.* **11**, 569 (2020).

- 1274 112.Zheng, L., Riehl, T. E. & Stenson, W. F. Regulation of colonic epithelial repair in  
1275 mice by Toll-like receptors and hyaluronic acid. *Gastroenterology* **137**, 2041–2051  
1276 (2009).
- 1277 113.Seiden-Long, I. *et al.* Gab1 but not Grb2 mediates tumor progression in Met  
1278 overexpressing colorectal cancer cells. *Carcinogenesis* **29**, 647–655 (2008).
- 1279 114.Liu, D.-Q. *et al.* Increased RIPK4 expression is associated with progression and  
1280 poor prognosis in cervical squamous cell carcinoma patients. *Sci. Rep.* **5**, 11955  
1281 (2015).
- 1282 115.Huang, X. *et al.* Phosphorylation of Dishevelled by protein kinase RIPK4 regulates  
1283 Wnt signaling. *Science* **339**, 1441–1445 (2013).
- 1284 116.Liu, J.-Y. *et al.* RIPK4 promotes bladder urothelial carcinoma cell aggressiveness  
1285 by upregulating VEGF-A through the NF- $\kappa$ B pathway. *Br. J. Cancer* **118**, 1617–  
1286 1627 (2018).
- 1287 117.Yang, X., Yue, Y. & Xiong, S. Dpep2 Emerging as a Modulator of Macrophage  
1288 Inflammation Confers Protection Against CVB3-Induced Viral Myocarditis. *Front.*  
1289 *Cell. Infect. Microbiol.* **9**, 57 (2019).
- 1290 118.Li, S., Ning, L.-G., Lou, X.-H. & Xu, G.-Q. Necroptosis in inflammatory bowel  
1291 disease and other intestinal diseases. *World J Clin Cases* **6**, 745–752 (2018).
- 1292 119.Garcia-Carbonell, R., Yao, S.-J., Das, S. & Guma, M. Dysregulation of Intestinal  
1293 Epithelial Cell RIPK Pathways Promotes Chronic Inflammation in the IBD Gut.  
1294 *Front. Immunol.* **10**, 1094 (2019).
- 1295 120.Liu, Z.-Y. *et al.* RIP3 promotes colitis-associated colorectal cancer by controlling  
1296 tumor cell proliferation and CXCL1-induced immune suppression. *Theranostics* **9**,

- 1297 3659–3673 (2019).
- 1298 121. Jayakumar, A. & Bothwell, A. L. M. RIPK3-Induced Inflammation by I-MDSCs  
1299 Promotes Intestinal Tumors. *Cancer Res.* **79**, 1587–1599 (2019).
- 1300 122. Conev, N. V. *et al.* RIPK3 expression as a potential predictive and prognostic  
1301 marker in metastatic colon cancer. *Clin. Invest. Med.* **42**, E31–E38 (2019).
- 1302 123. Wang, Z. *et al.* Regulation of innate immune responses by DAI (DLM-1/ZBP1) and  
1303 other DNA-sensing molecules. *Proc. Natl. Acad. Sci. U. S. A.* **105**, 5477–5482  
1304 (2008).
- 1305 124. Kuriakose, T. & Kanneganti, T.-D. ZBP1: Innate Sensor Regulating Cell Death and  
1306 Inflammation. *Trends Immunol.* **39**, 123–134 (2018).
- 1307 125. Zhang, T. *et al.* Influenza Virus Z-RNAs Induce ZBP1-Mediated Necroptosis. *Cell*  
1308 **180**, 1115–1129.e13 (2020).
- 1309 126. O’Flanagan, C. H. & O’Neill, C. PINK1 signalling in cancer biology. *Biochim.*  
1310 *Biophys. Acta* **1846**, 590–598 (2014).
- 1311 127. Chang, J. Y., Yi, H.-S., Kim, H.-W. & Shong, M. Dysregulation of mitophagy in  
1312 carcinogenesis and tumor progression. *Biochim. Biophys. Acta Bioenerg.* **1858**,  
1313 633–640 (2017).
- 1314 128. Novak, E. A. & Mollen, K. P. Mitochondrial dysfunction in inflammatory bowel  
1315 disease. *Front Cell Dev Biol* **3**, 62 (2015).
- 1316 129. Alomair, A. O. *et al.* Colonic Mucosal Microbiota in Colorectal Cancer: A Single-  
1317 Center Metagenomic Study in Saudi Arabia. *Gastroenterol. Res. Pract.* **2018**,  
1318 5284754 (2018).
- 1319 130. Ai, D. *et al.* Identifying Gut Microbiota Associated With Colorectal Cancer Using a

- 1320 Zero-Inflated Lognormal Model. *Front. Microbiol.* **10**, 826 (2019).
- 1321 131.Chen, J. *et al.* An expansion of rare lineage intestinal microbes characterizes  
1322 rheumatoid arthritis. *Genome Med.* **8**, 43 (2016).
- 1323 132.Taverniti, V. & Guglielmetti, S. Methodological issues in the study of intestinal  
1324 microbiota in irritable bowel syndrome. *World J. Gastroenterol.* **20**, 8821–8836  
1325 (2014).
- 1326 133.Sato, Y. *et al.* Up-regulated Annexin A1 expression in gastrointestinal cancer is  
1327 associated with cancer invasion and lymph node metastasis. *Exp. Ther. Med.* **2**,  
1328 239–243 (2011).
- 1329 134.Sena, A. *et al.* Dysregulation of anti-inflammatory annexin A1 expression in  
1330 progressive Crohns Disease. *PLoS One* **8**, e76969 (2013).
- 1331 135.Babbin, B. A. *et al.* Annexin A1 regulates intestinal mucosal injury, inflammation,  
1332 and repair. *J. Immunol.* **181**, 5035–5044 (2008).
- 1333 136.Mazmanian, S. K., Liu, C. H., Tzianabos, A. O. & Kasper, D. L. An  
1334 immunomodulatory molecule of symbiotic bacteria directs maturation of the host  
1335 immune system. *Cell* **122**, 107–118 (2005).
- 1336 137.Zitomersky, N. L. *et al.* Characterization of adherent bacteroidales from intestinal  
1337 biopsies of children and young adults with inflammatory bowel disease. *PLoS One*  
1338 **8**, e63686 (2013).
- 1339 138.Park, B. S. & Lee, J.-O. Recognition of lipopolysaccharide pattern by TLR4  
1340 complexes. *Exp. Mol. Med.* **45**, e66 (2013).
- 1341 139.Rakoff-Nahoum, S., Paglino, J., Eslami-Varzaneh, F., Edberg, S. & Medzhitov, R.  
1342 Recognition of commensal microflora by toll-like receptors is required for intestinal

- 1343 homeostasis. *Cell* **118**, 229–241 (2004).
- 1344 140. Yesudhas, D., Gosu, V., Anwar, M. A. & Choi, S. Multiple roles of toll-like receptor 4  
1345 in colorectal cancer. *Front. Immunol.* **5**, 334 (2014).
- 1346 141. Lu, Y., Li, X., Liu, S., Zhang, Y. & Zhang, D. Toll-like Receptors and Inflammatory  
1347 Bowel Disease. *Front. Immunol.* **9**, 72 (2018).
- 1348 142. Perera, M., Al-Hebshi, N. N., Speicher, D. J., Perera, I. & Johnson, N. W. Emerging  
1349 role of bacteria in oral carcinogenesis: a review with special reference to perio-  
1350 pathogenic bacteria. *J. Oral Microbiol.* **8**, 32762 (2016).
- 1351 143. Alam, M. T. *et al.* Microbial imbalance in inflammatory bowel disease patients at  
1352 different taxonomic levels. *Gut Pathog.* **12**, 1 (2020).
- 1353 144. Nakatsu, G. *et al.* Gut mucosal microbiome across stages of colorectal  
1354 carcinogenesis. *Nat. Commun.* **6**, 8727 (2015).
- 1355 145. Graham, D. B. & Xavier, R. J. Pathway paradigms revealed from the genetics of  
1356 inflammatory bowel disease. *Nature* **578**, 527–539 (2020).
- 1357 146. Farooqi, A. A., de la Roche, M., Djamgoz, M. B. A. & Siddik, Z. H. Overview of the  
1358 oncogenic signaling pathways in colorectal cancer: Mechanistic insights. *Semin.*  
1359 *Cancer Biol.* **58**, 65–79 (2019).
- 1360 147. Lanis, J. M., Kao, D. J., Alexeev, E. E. & Colgan, S. P. Tissue metabolism and the  
1361 inflammatory bowel diseases. *J. Mol. Med.* **95**, 905–913 (2017).
- 1362 148. Francescone, R., Hou, V. & Grivennikov, S. I. Cytokines, IBD, and colitis-  
1363 associated cancer. *Inflamm. Bowel Dis.* **21**, 409–418 (2015).
- 1364 149. Barbara, G. *et al.* The immune system in irritable bowel syndrome. *J.*  
1365 *Neurogastroenterol. Motil.* **17**, 349–359 (2011).

- 1366 150. Luca, F., Kupfer, S. S., Knights, D., Khoruts, A. & Blekhman, R. Functional  
1367 Genomics of Host-Microbiome Interactions in Humans. *Trends Genet.* **34**, 30–40  
1368 (2018).
- 1369 151. Burns, M. B. *et al.* APOBEC3B is an enzymatic source of mutation in breast cancer.  
1370 *Nature* **494**, 366–370 (2013).
- 1371 152. Andrews, S. & Others. FastQC: a quality control tool for high throughput sequence  
1372 data. (2010).
- 1373 153. Bolger, A. M., Lohse, M. & Usadel, B. Trimmomatic: a flexible trimmer for Illumina  
1374 sequence data. *Bioinformatics* **30**, 2114–2120 (2014).
- 1375 154. Kim, D., Langmead, B. & Salzberg, S. L. HISAT: a fast spliced aligner with low  
1376 memory requirements. *Nat. Methods* **12**, 357–360 (2015).
- 1377 155. Liao, Y., Smyth, G. K. & Shi, W. featureCounts: an efficient general purpose  
1378 program for assigning sequence reads to genomic features. *Bioinformatics* **30**,  
1379 923–930 (2014).
- 1380 156. Poyet, M. *et al.* A library of human gut bacterial isolates paired with longitudinal  
1381 multiomics data enables mechanistic microbiome research. *Nat. Med.* (2019)  
1382 doi:10.1038/s41591-019-0559-3.
- 1383 157. Durinck, S., Spellman, P. T., Birney, E. & Huber, W. Mapping identifiers for the  
1384 integration of genomic datasets with the R/Bioconductor package biomaRt. *Nat.*  
1385 *Protoc.* **4**, 1184–1191 (2009).
- 1386 158. Love, M. I., Huber, W. & Anders, S. Moderated estimation of fold change and  
1387 dispersion for RNA-seq data with DESeq2. *Genome Biol.* **15**, 550 (2014).
- 1388 159. Salter, S. J. *et al.* Reagent and laboratory contamination can critically impact

- 1389 sequence-based microbiome analyses. *BMC Biol.* **12**, 87 (2014).
- 1390 160.Oksanen, J. *et al.* The vegan package. *Community ecology package* **10**, 631–637  
1391 (2007).
- 1392 161.Quinn, T. P., Erb, I., Richardson, M. F. & Crowley, T. M. Understanding sequencing  
1393 data as compositions: an outlook and review. *Bioinformatics* **34**, 2870–2878 (2018).
- 1394 162.Hotelling, H. Relations Between Two Sets of Variates. *Biometrika* **28**, 321–377  
1395 (1936).
- 1396 163.Witten, D., Tibshirani, R., Gross, S. & Narasimhan, B. Pma: Penalized multivariate  
1397 analysis. *R package version 1*, (2013).
- 1398 164.Ash, J. T., Darnell, G., Munro, D., Engelhardt, B. E. & Authorship, I. E. Joint  
1399 analysis of gene expression levels and histological images identifies genes  
1400 associated with tissue morphology. doi:10.1101/458711.
- 1401 165.Subramanian, A. *et al.* Gene set enrichment analysis: a knowledge-based  
1402 approach for interpreting genome-wide expression profiles. *Proc. Natl. Acad. Sci.*  
1403 *U. S. A.* **102**, 15545–15550 (2005).
- 1404 166.Liberzon, A. *et al.* Molecular signatures database (MSigDB) 3.0. *Bioinformatics* **27**,  
1405 1739–1740 (2011).
- 1406 167.Waardenberg, A. J., Basset, S. D., Bouveret, R. & Harvey, R. P. CompGO: an R  
1407 package for comparing and visualizing Gene Ontology enrichment differences  
1408 between DNA binding experiments. *BMC Bioinformatics* **16**, 275 (2015).
- 1409 168.Morris, J. A. & Gardner, M. J. Calculating confidence intervals for relative risks  
1410 (odds ratios) and standardised ratios and rates. *Br. Med. J.* **296**, 1313–1316  
1411 (1988).

- 1412 169.Smoot, M. E., Ono, K., Ruscheinski, J., Wang, P.-L. & Ideker, T. Cytoscape 2.8:  
1413 new features for data integration and network visualization. *Bioinformatics* **27**, 431–  
1414 432 (2011).
- 1415 170.Friedman, J., Hastie, T. & Tibshirani, R. glmnet: Lasso and elastic-net regularized  
1416 generalized linear models. *R package version 1*, (2009).
- 1417 171.Dezeure, R., Bühlmann, P., Meier, L. & Meinshausen, N. High-Dimensional  
1418 Inference: Confidence Intervals, p-Values and R-Software hdi. *Stat. Sci.* **30**, 533–  
1419 558 (2015).
- 1420 172.Zhang, C.-H. & Zhang, S. S. Confidence intervals for low dimensional parameters  
1421 in high dimensional linear models. *J. R. Stat. Soc. Series B Stat. Methodol.* **76**,  
1422 217–242 (2014).
- 1423 173.Meinshausen, N. & Bühlmann, P. Stability selection. *J. R. Stat. Soc. Series B Stat.*  
1424 *Methodol.* **72**, 417–473 (2010).
- 1425 174.Hofner, B., Boccuto, L. & Göker, M. Controlling false discoveries in high-  
1426 dimensional situations: boosting with stability selection. *BMC Bioinformatics* **16**,  
1427 144 (2015).
- 1428
